# Supplementary material for: A Computational Method for Classifying Different Human Tissues with Quantitatively Tissue-Specific Expressed Genes
Source: MDPI journal article supplement (doi:10.3390/genes9090449), 2018-09-07

# ARAF

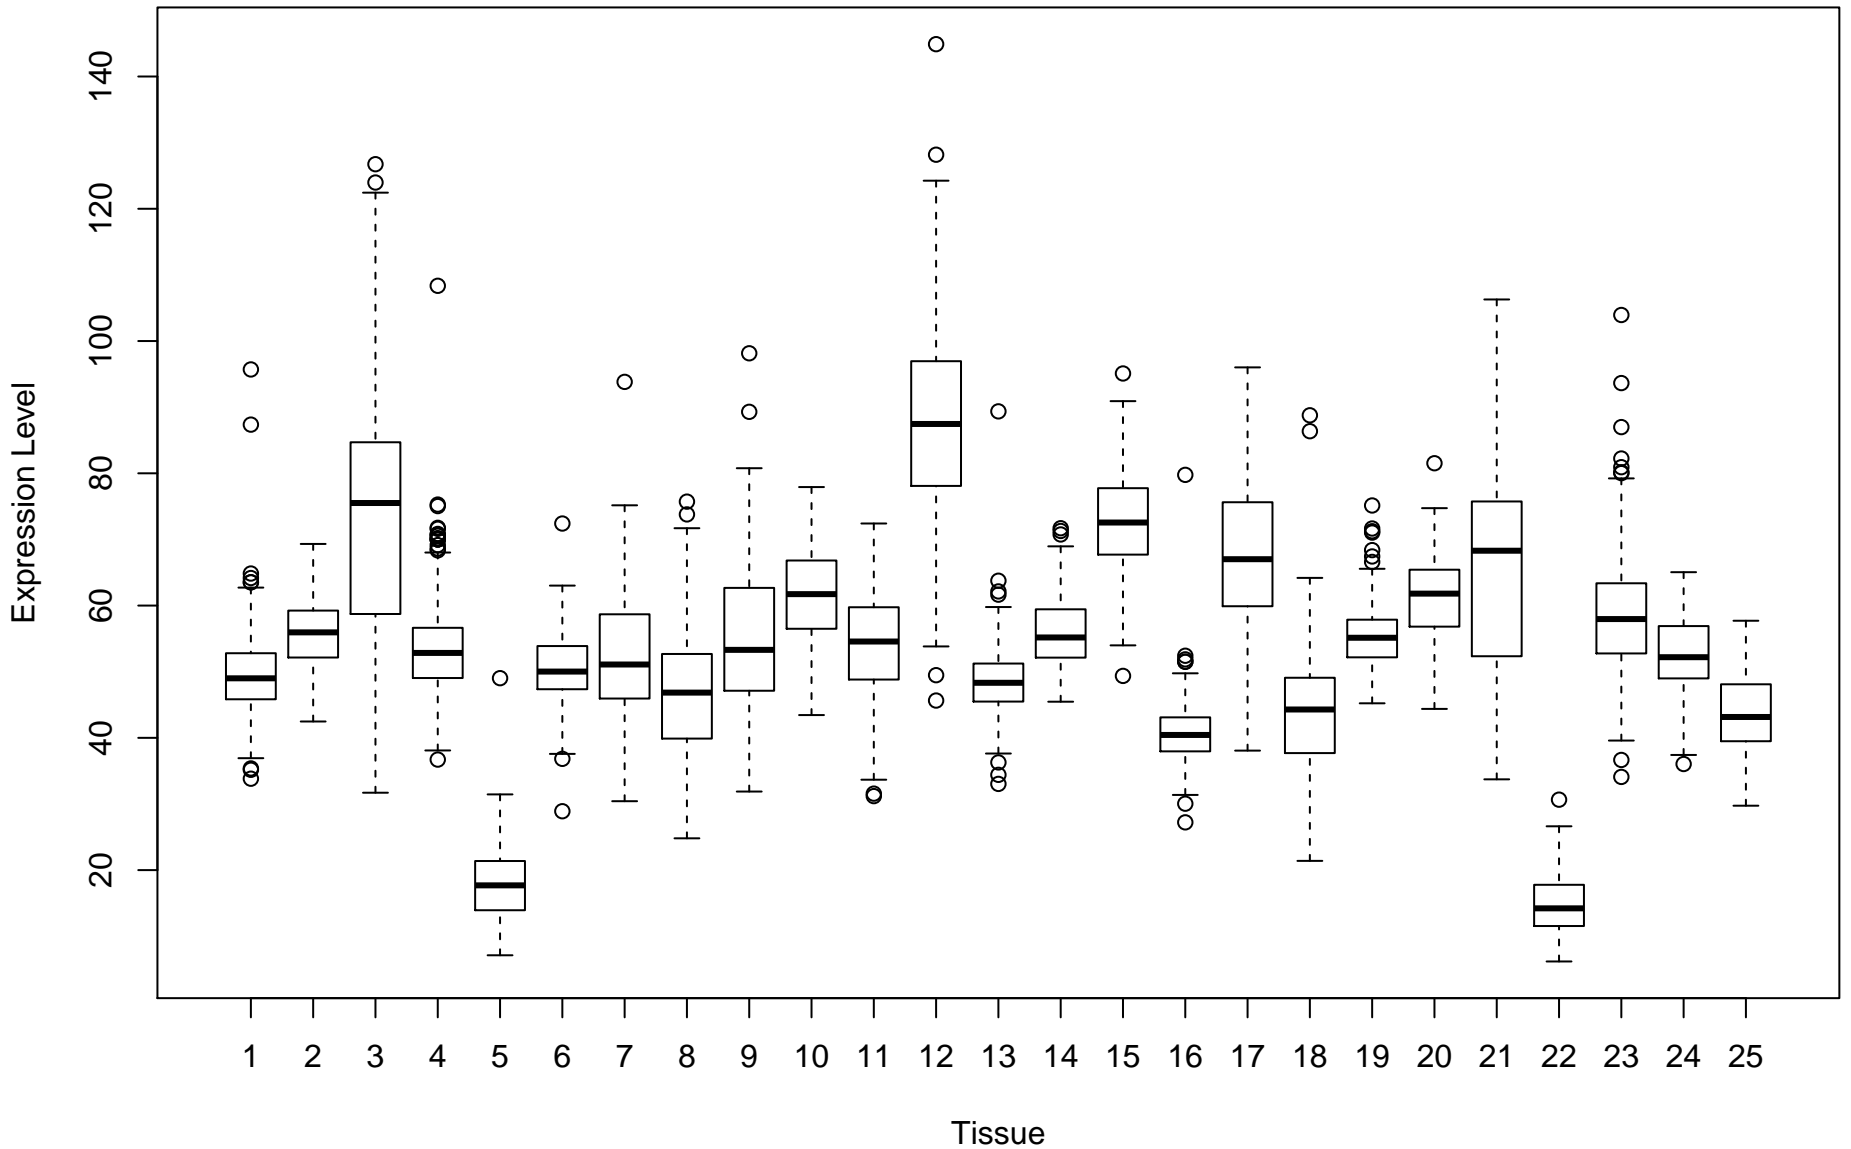

# ITGA3

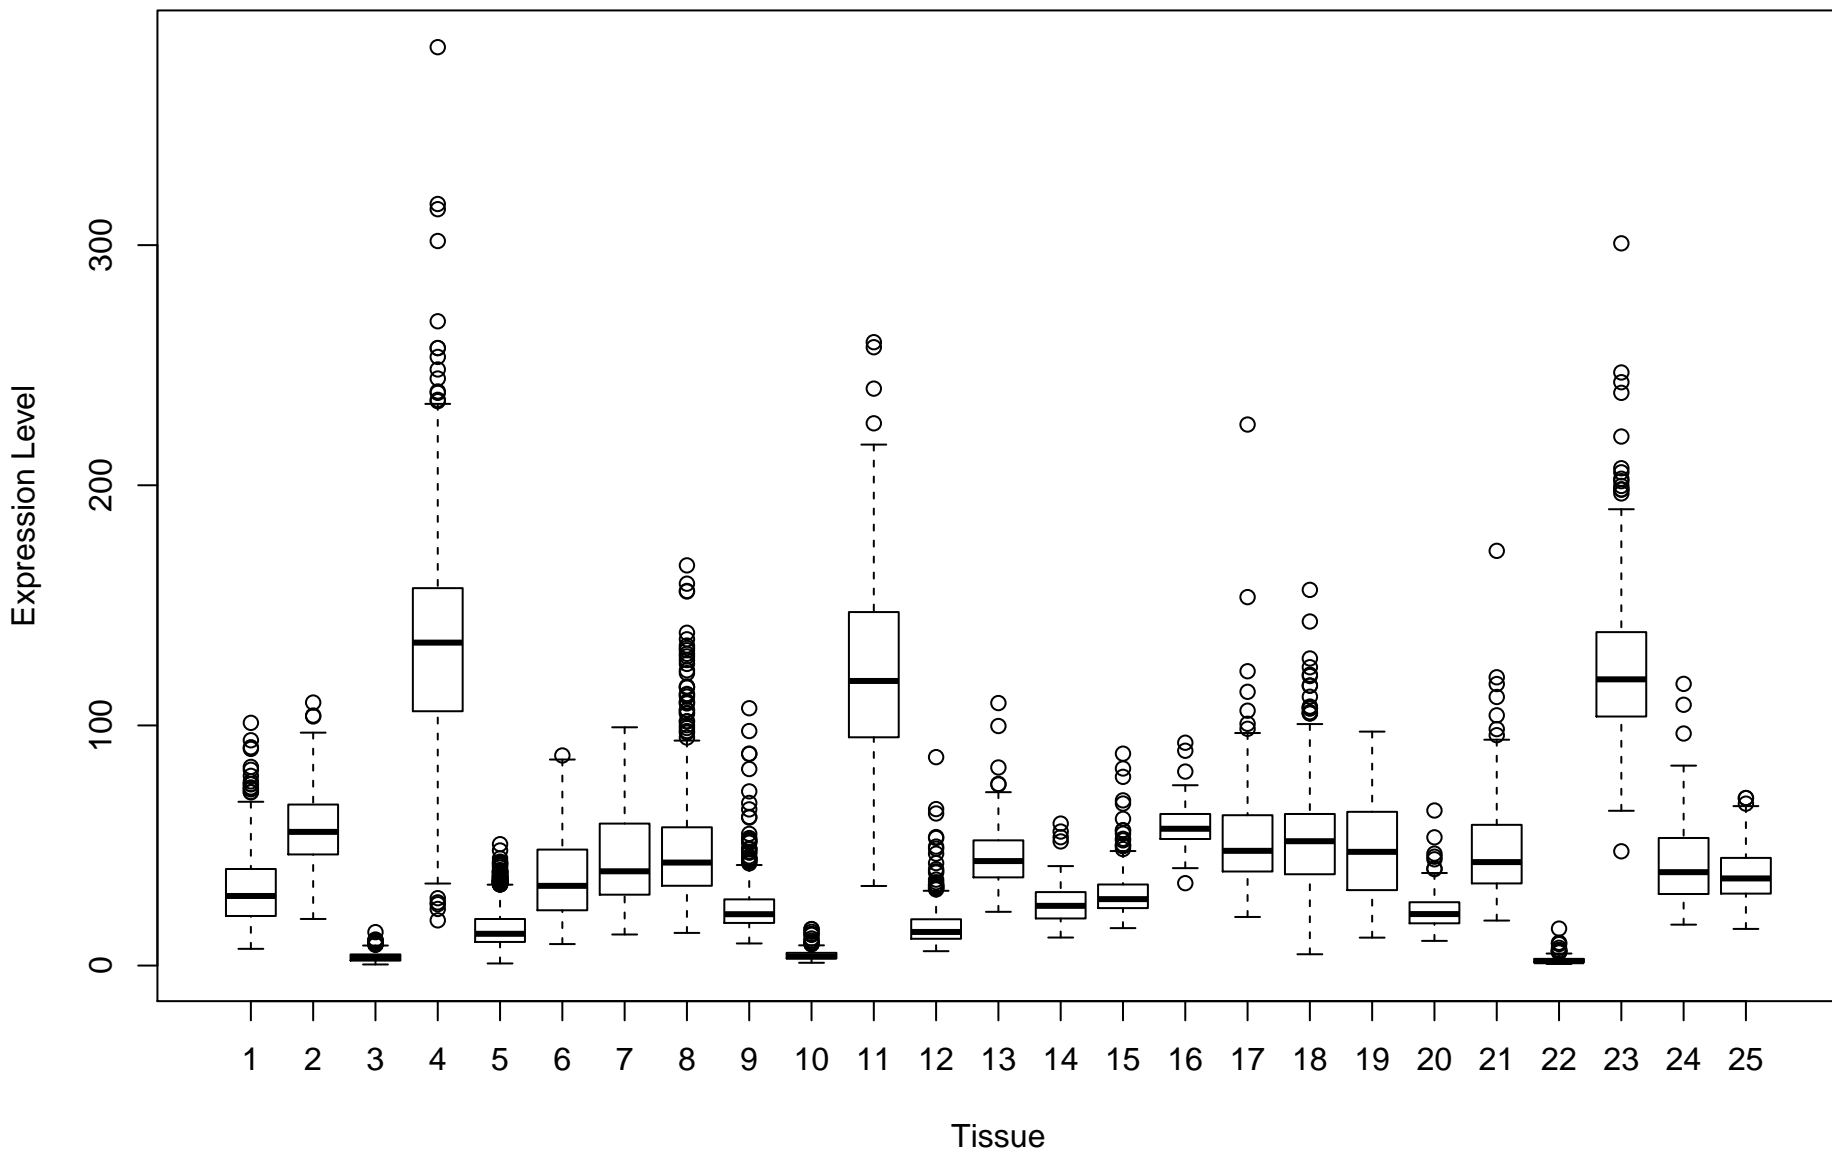

# SLAIN2

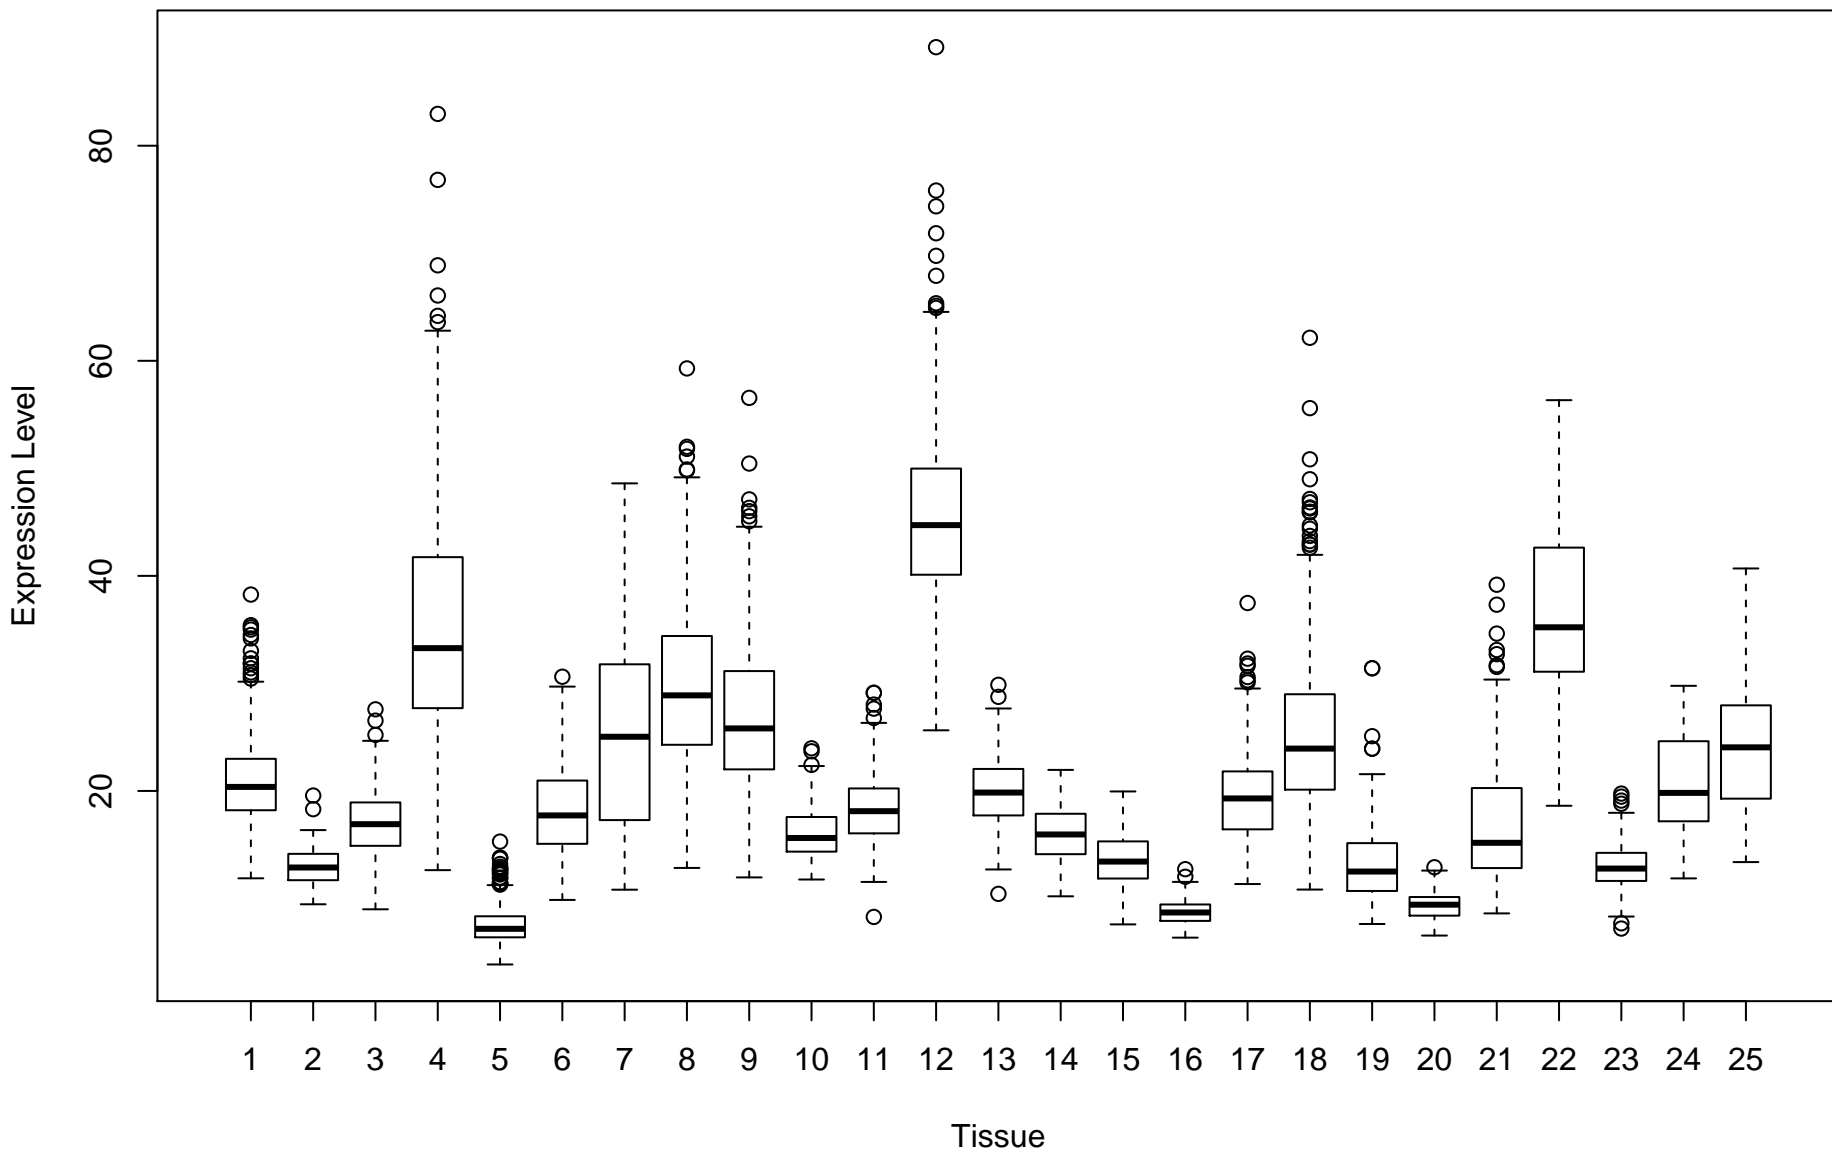

# ZNF532

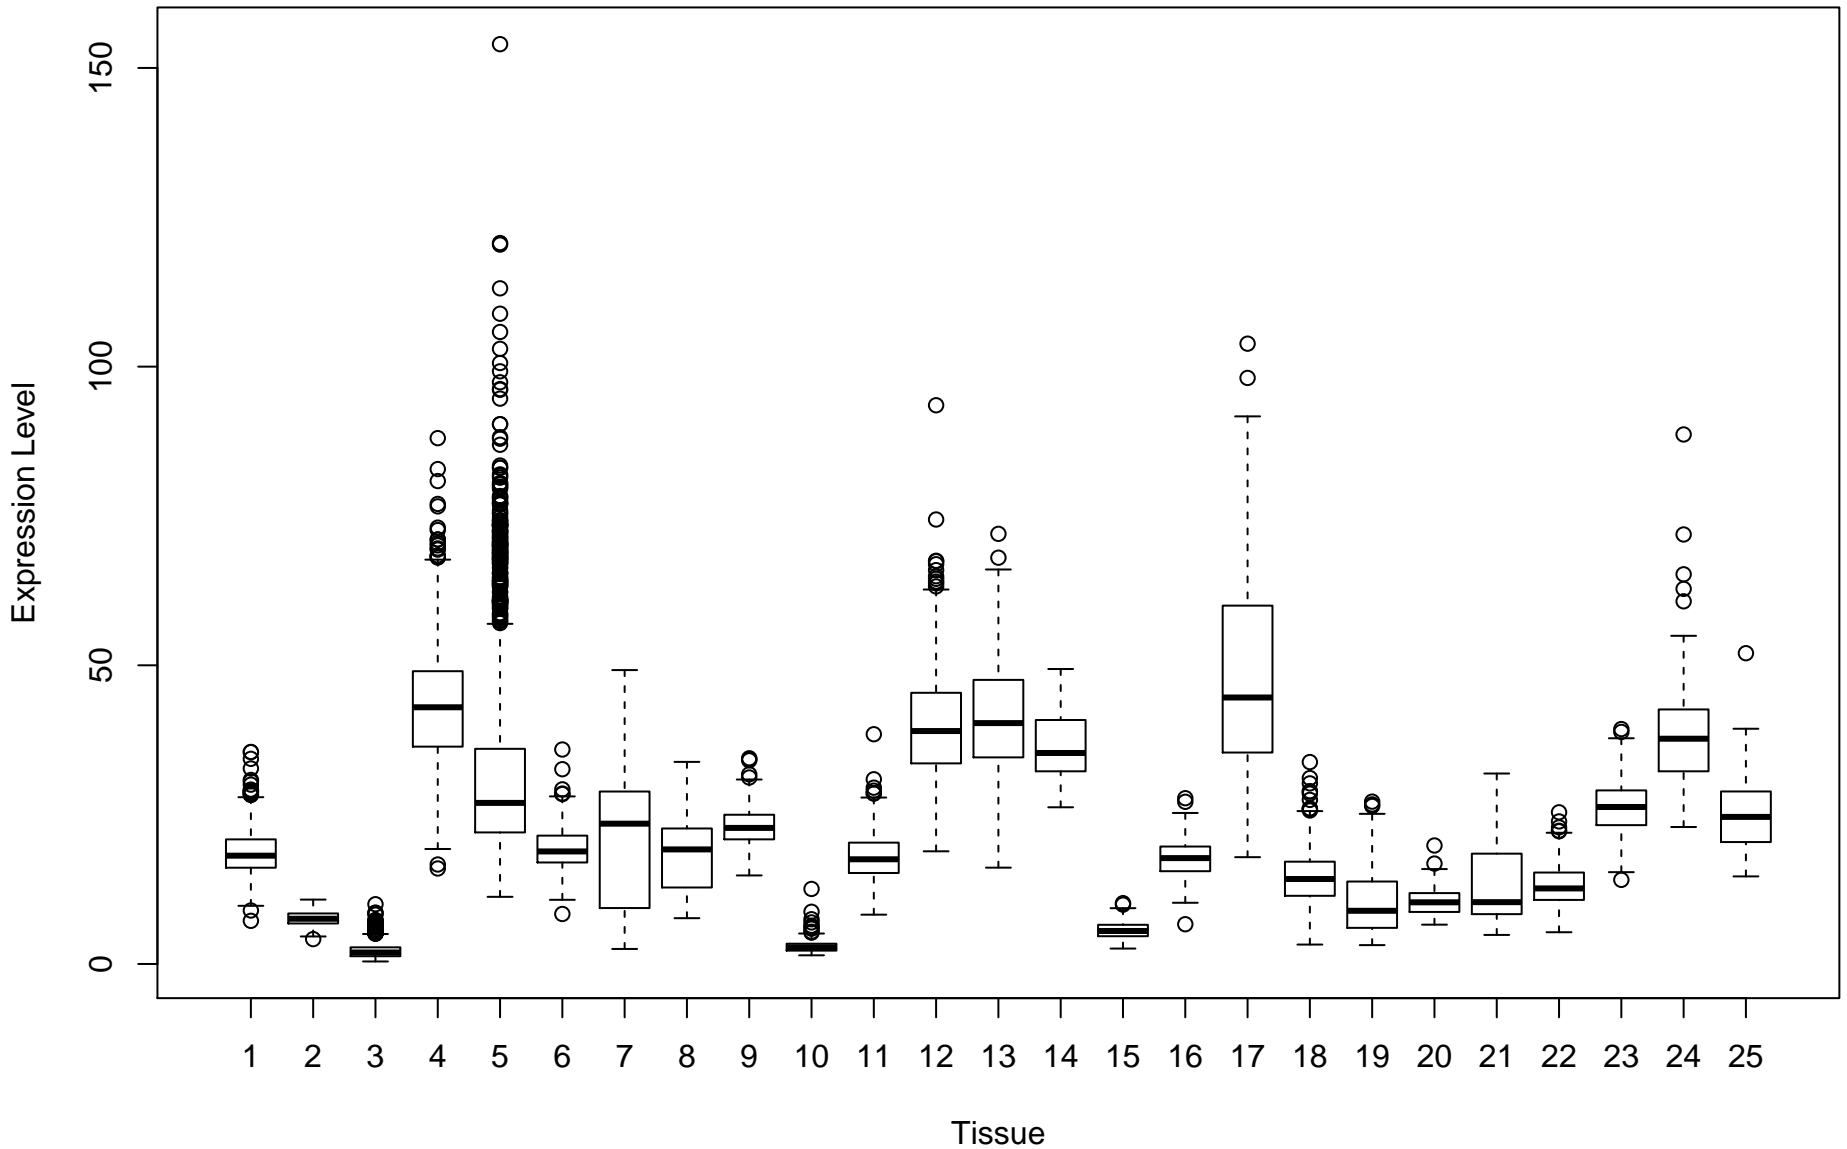

# PPIC

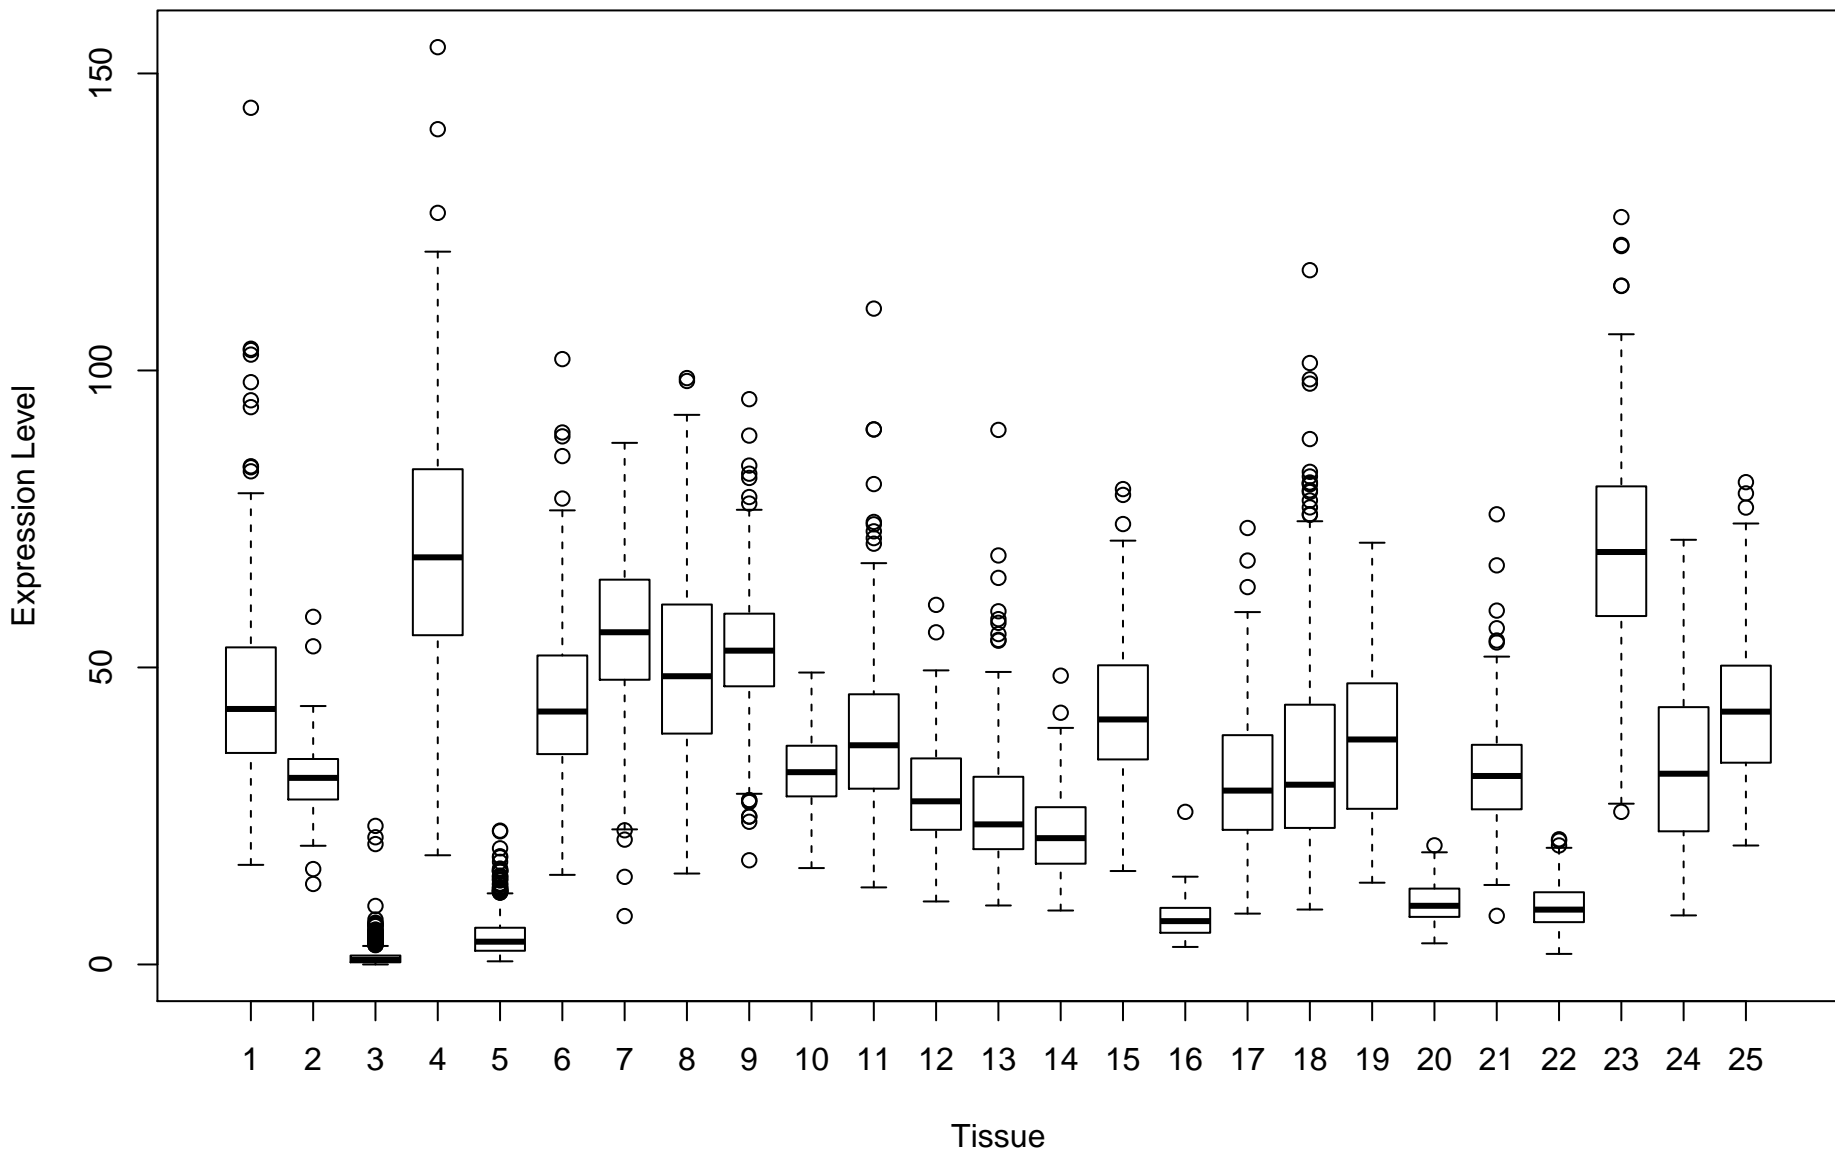

# KDELRL1

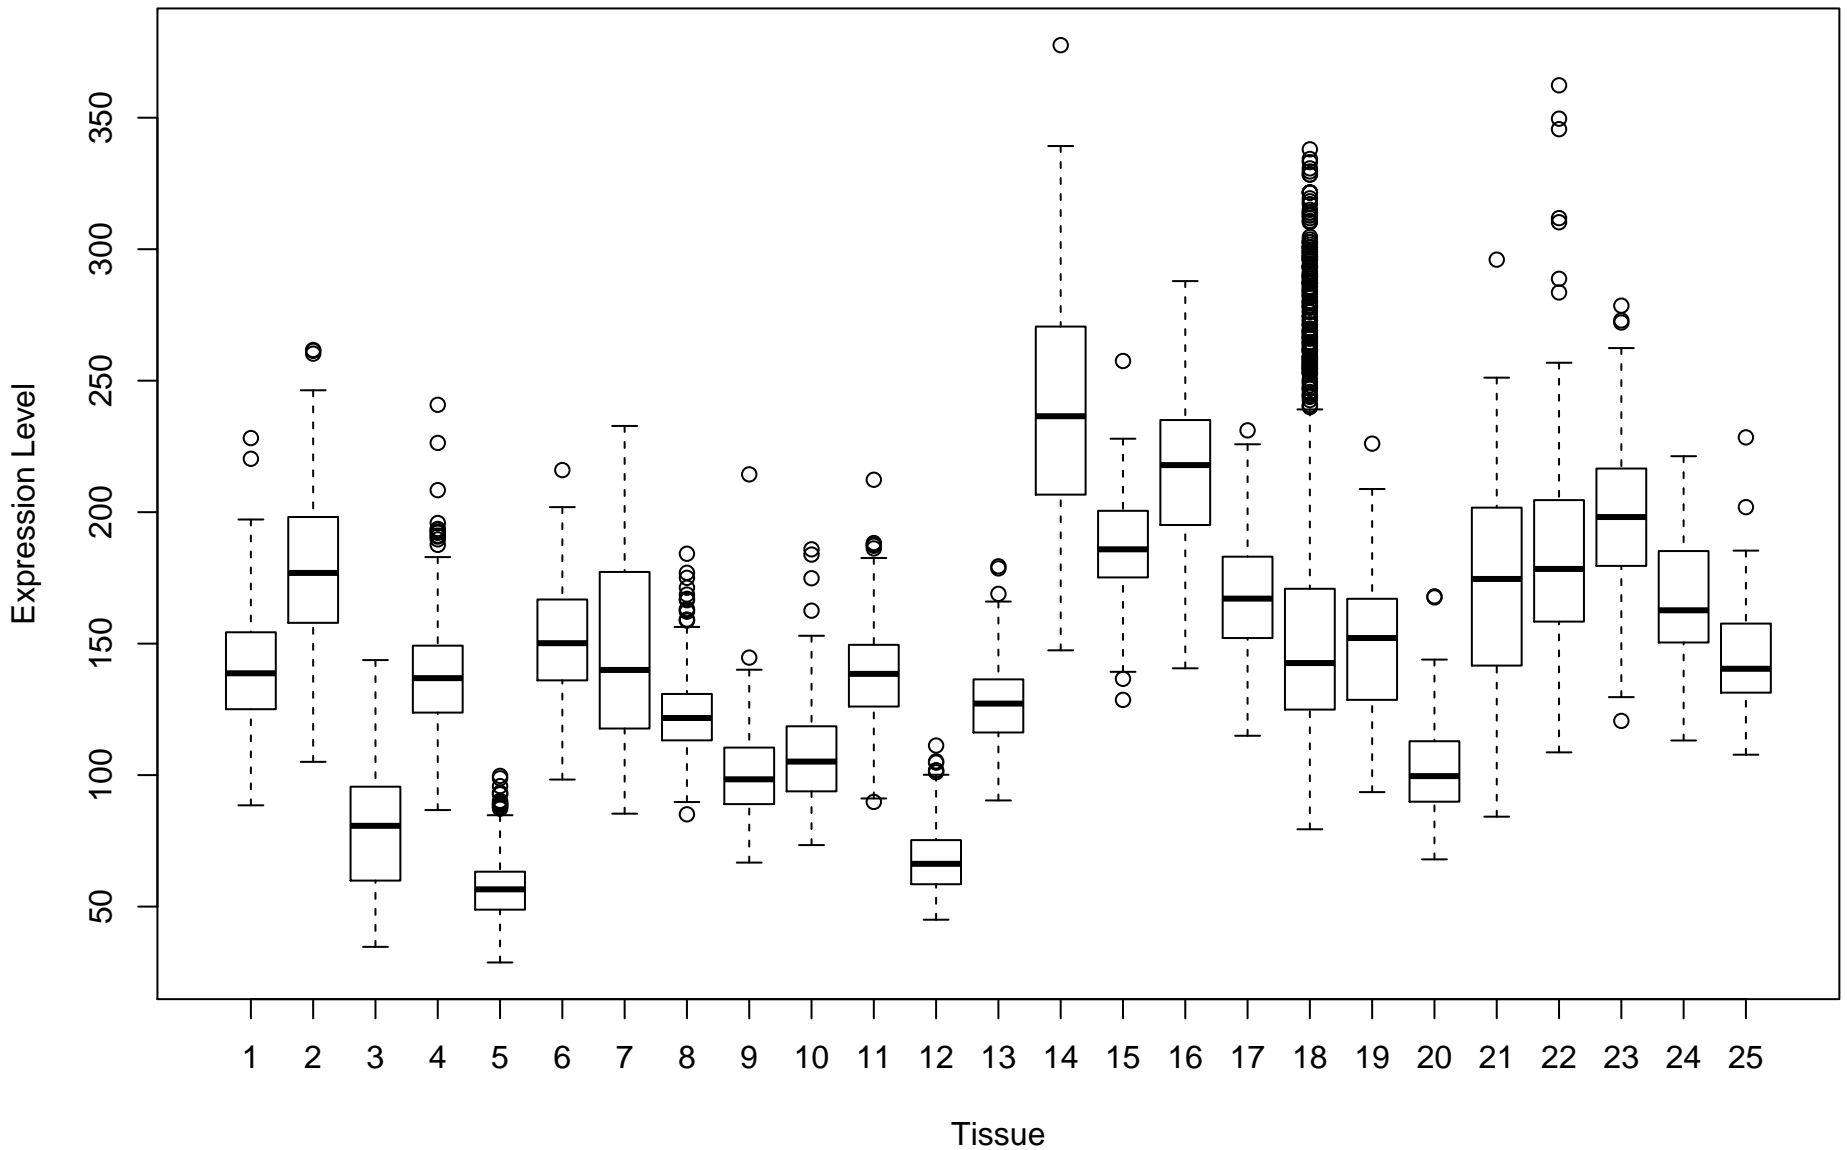

# NBL1

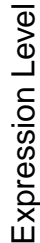

## Tissue

# PLP2

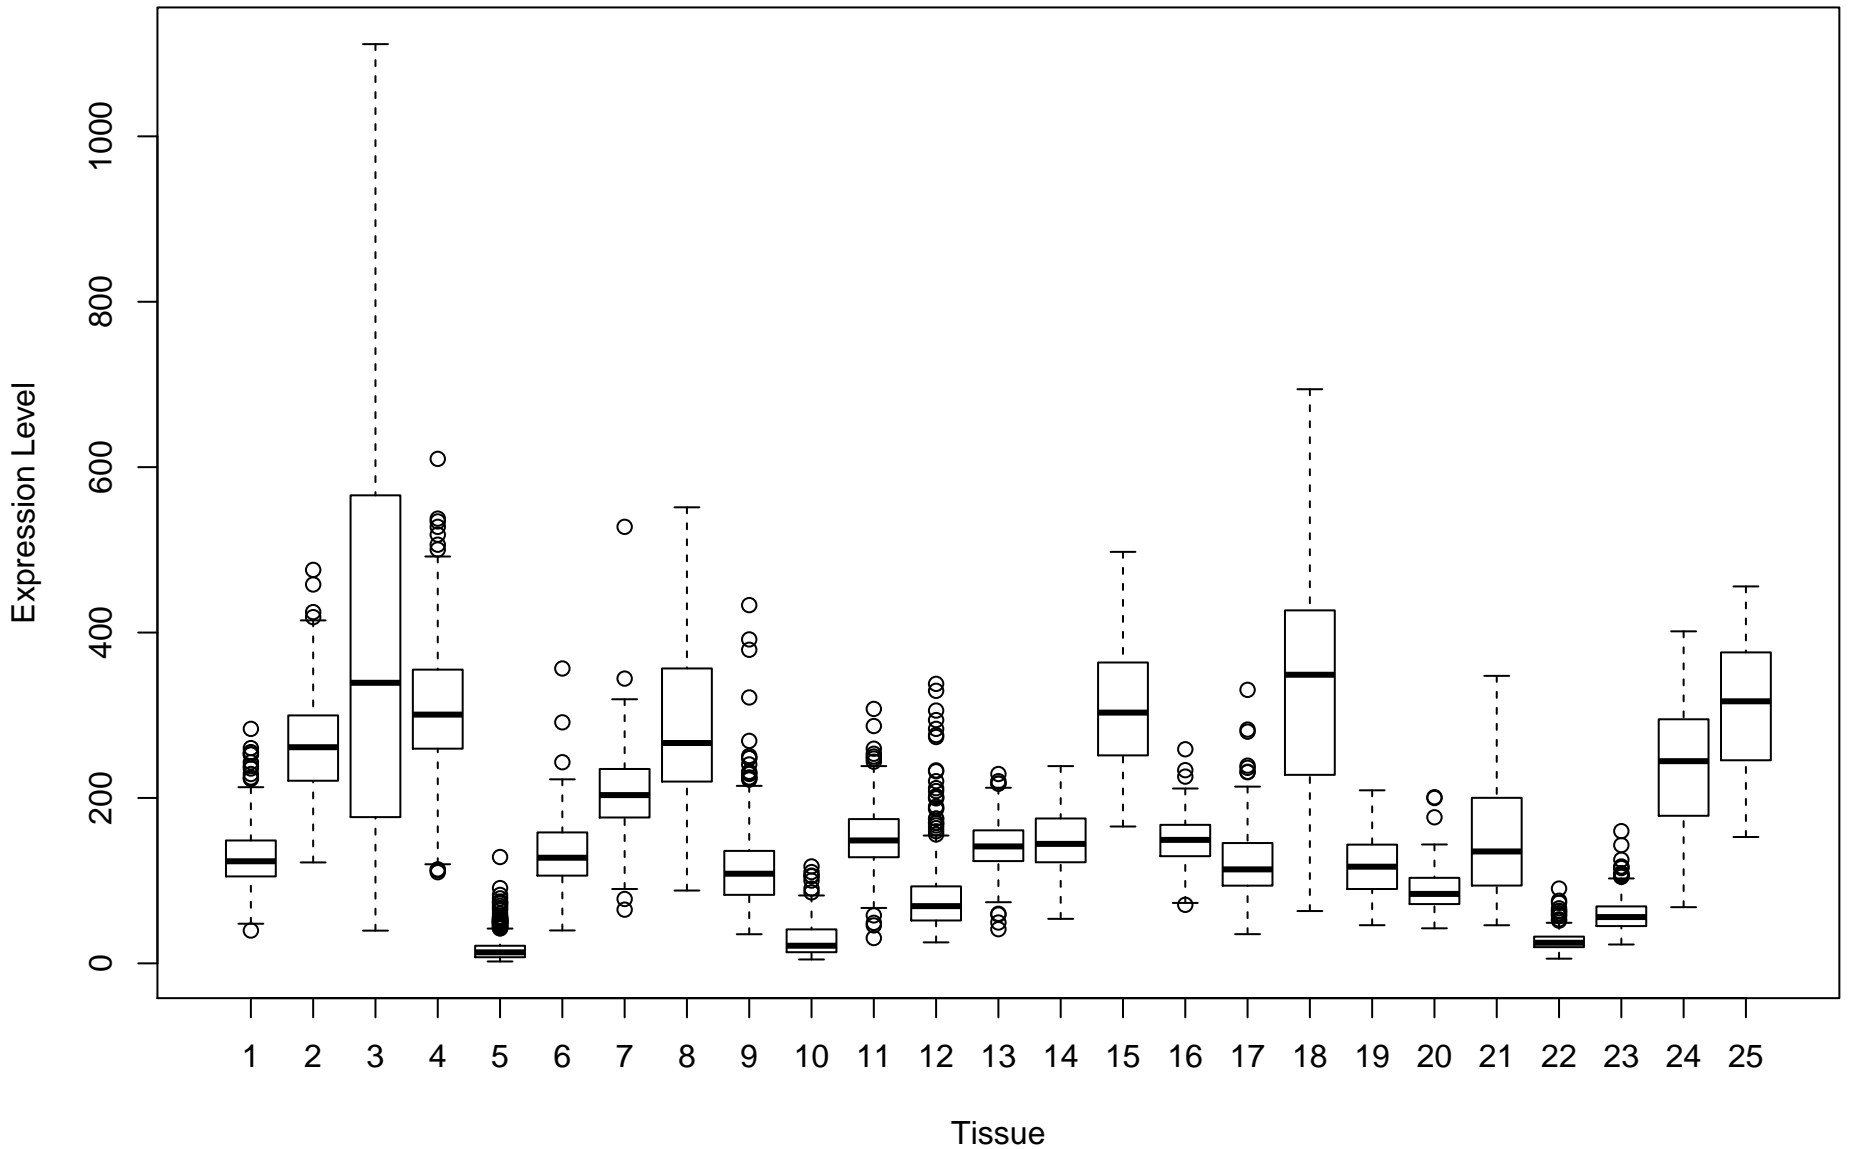



# STAT6

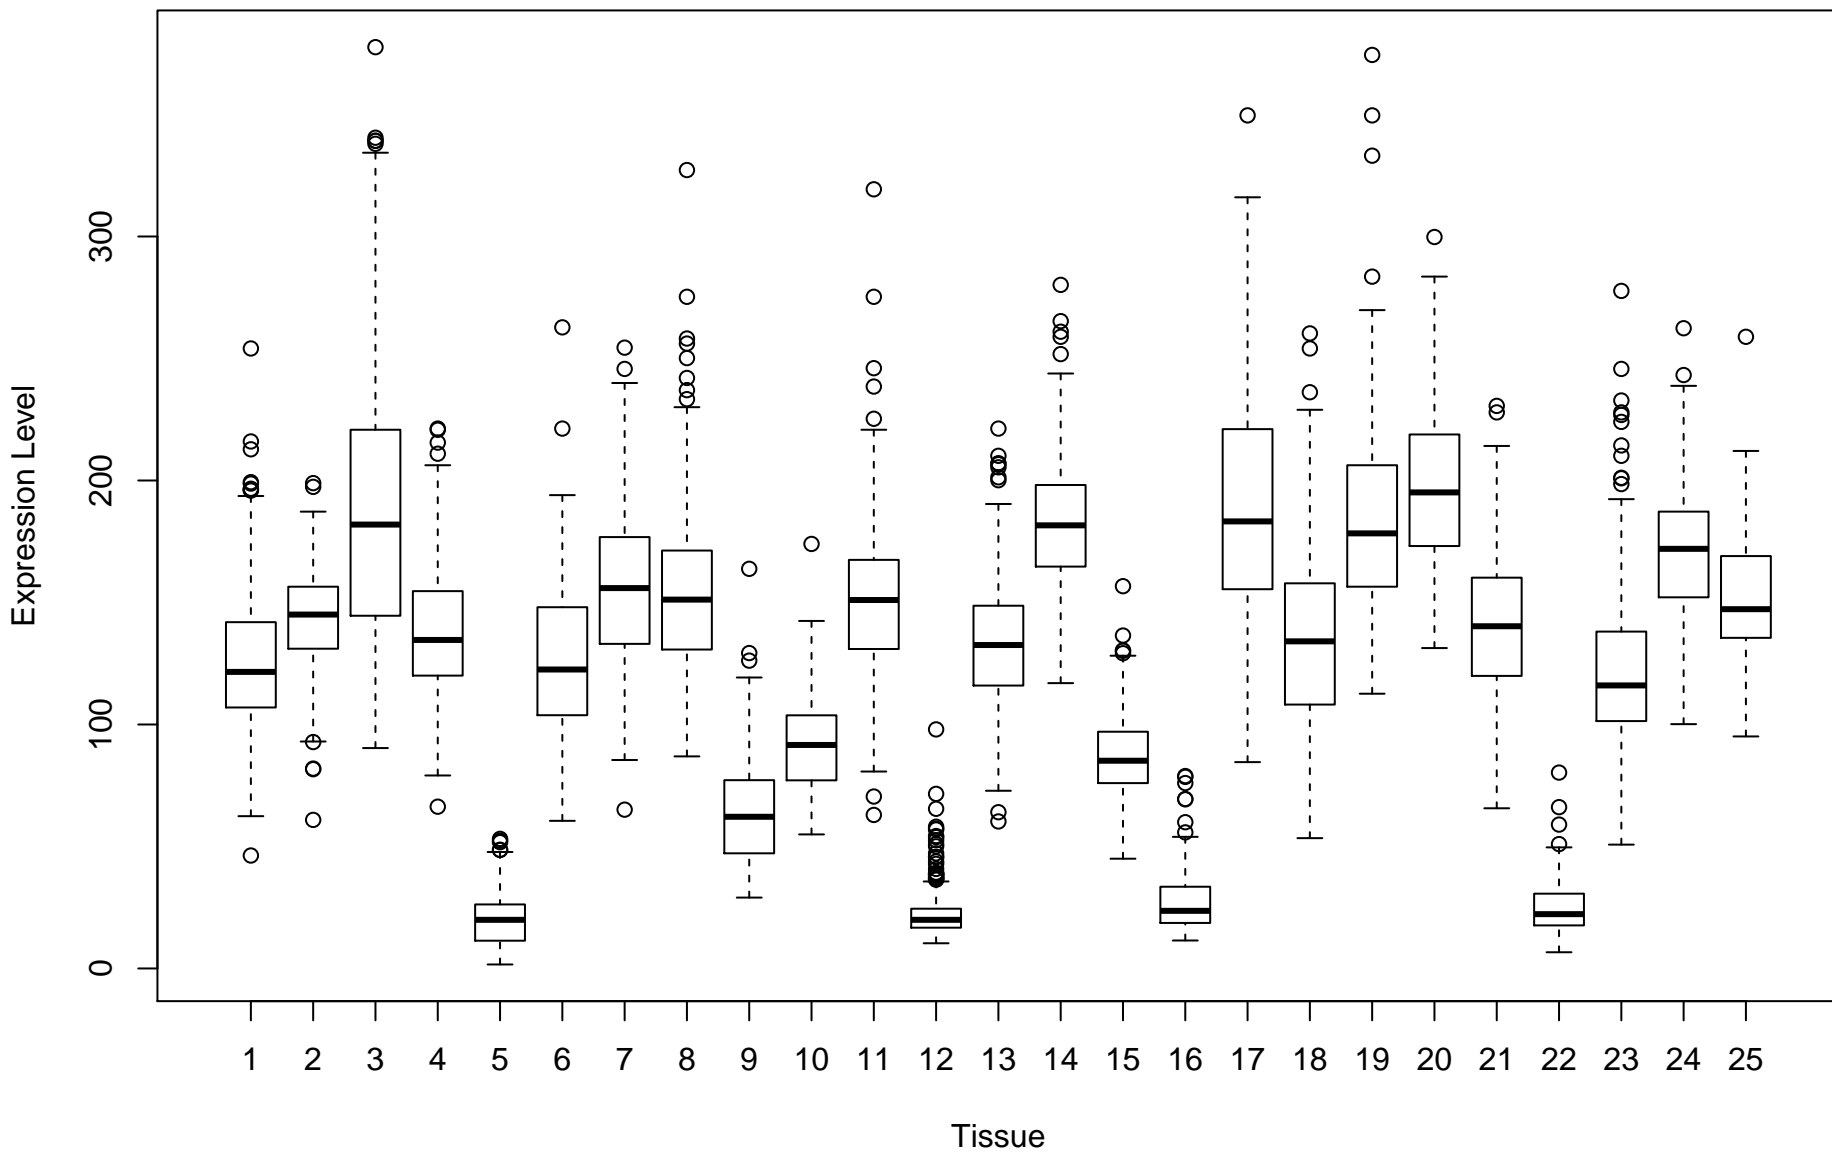

## ARHGAP23

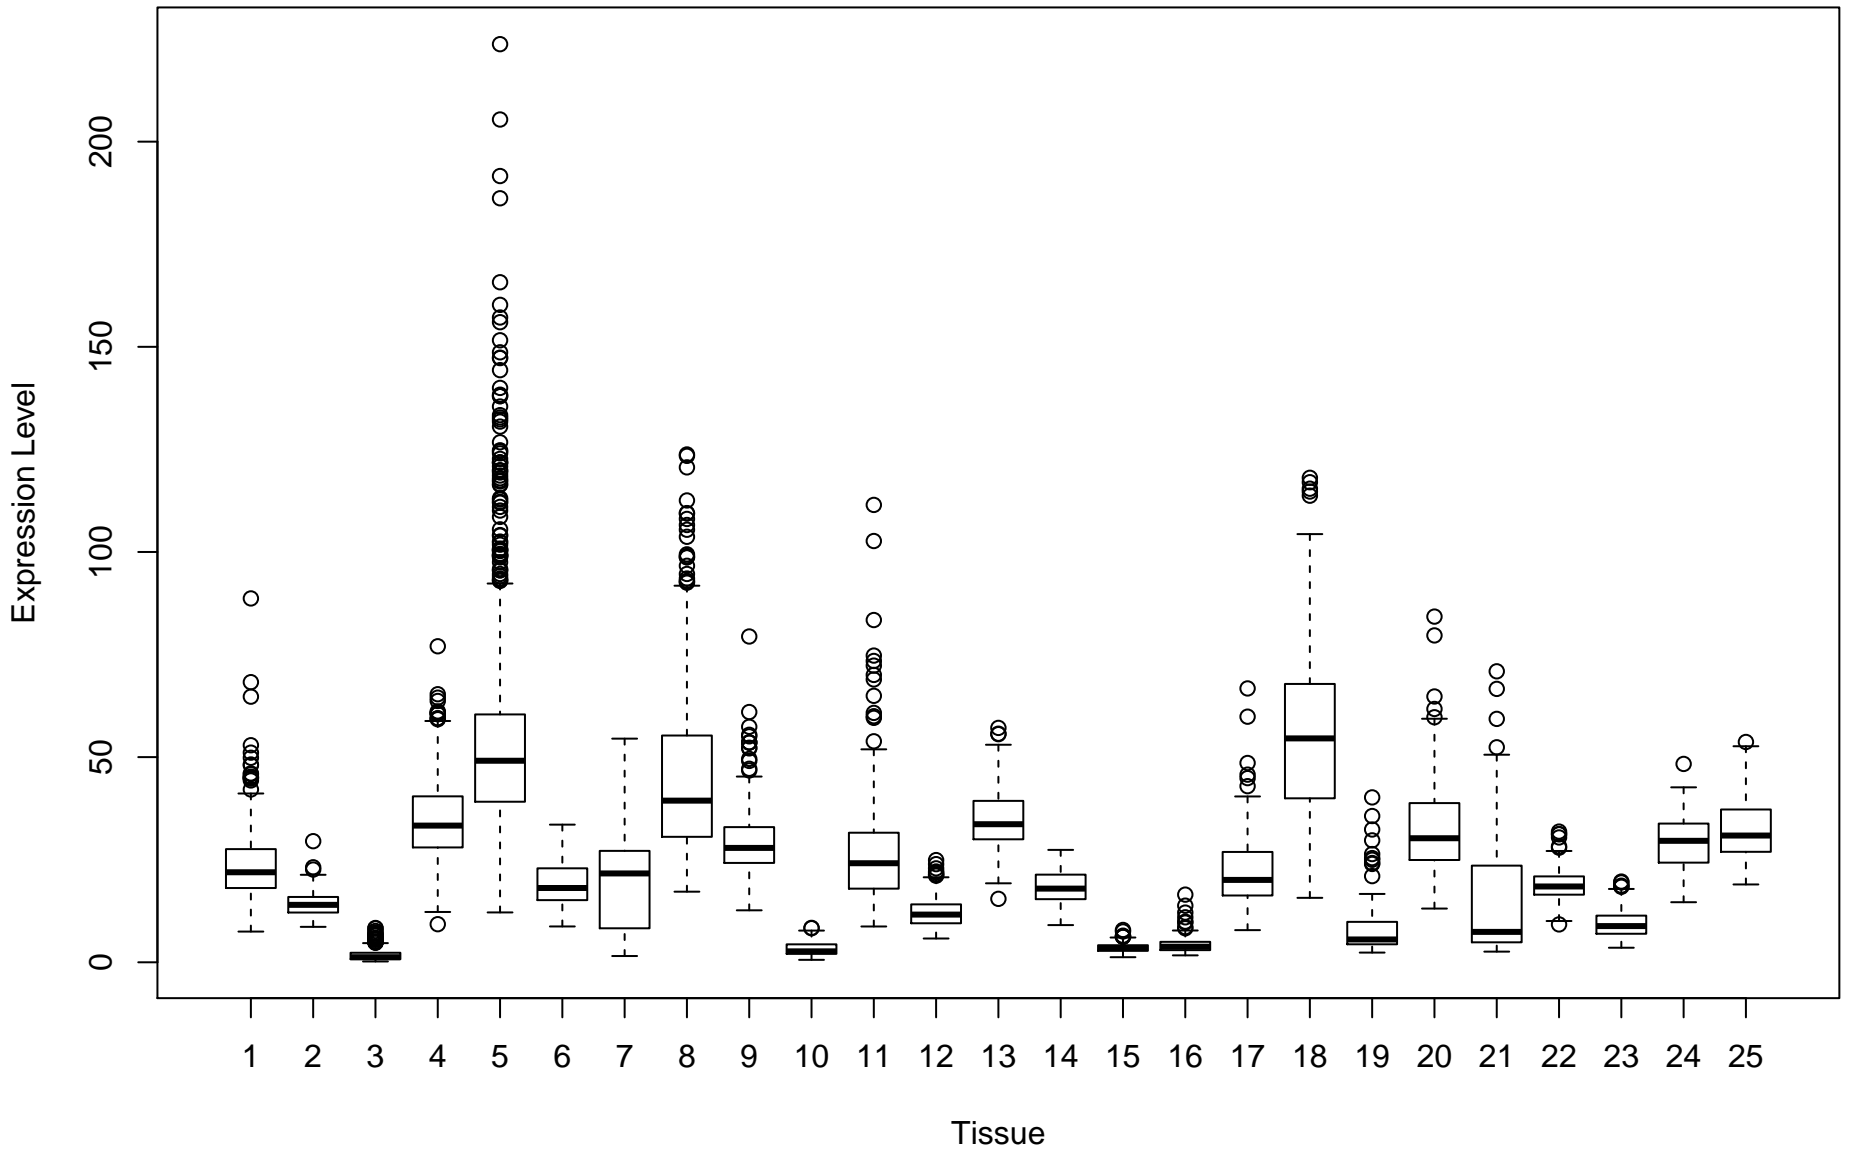

# LRIG3

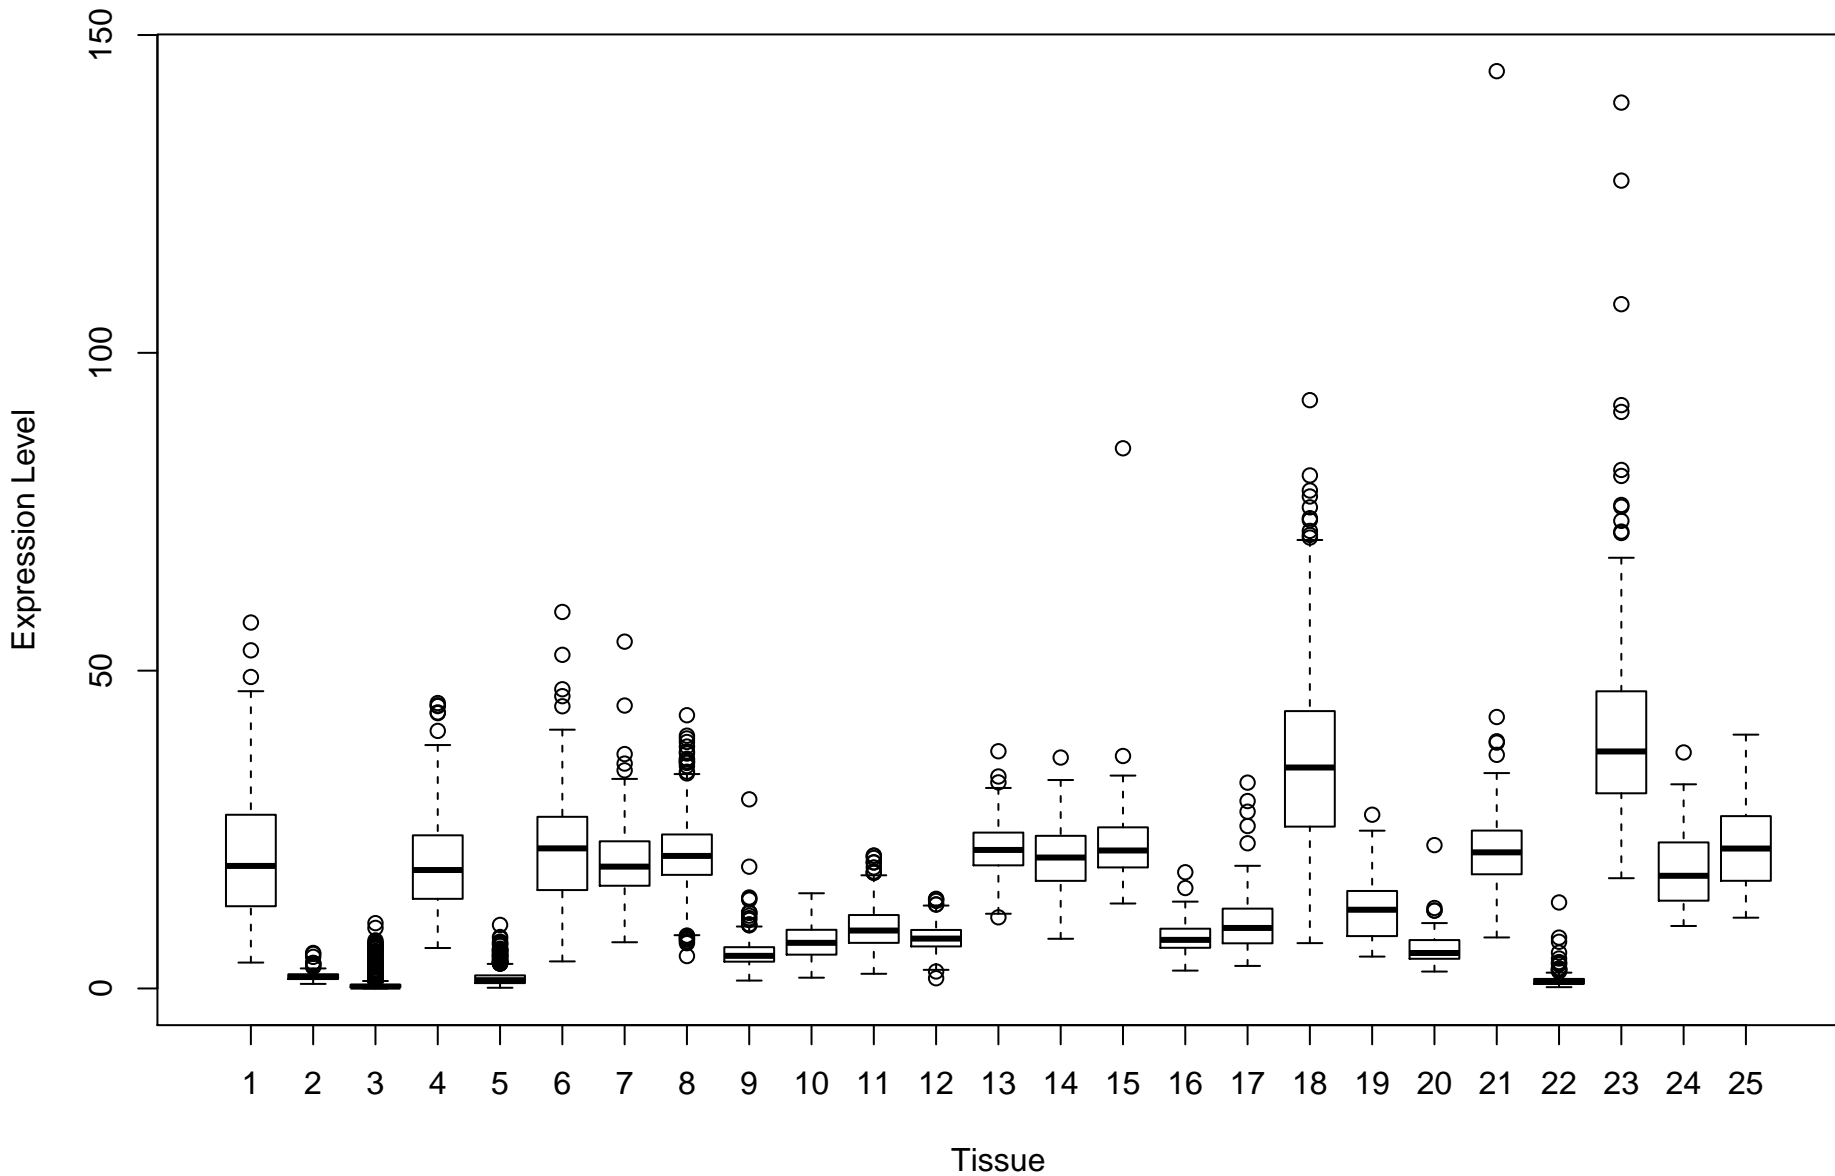

# MANBAL

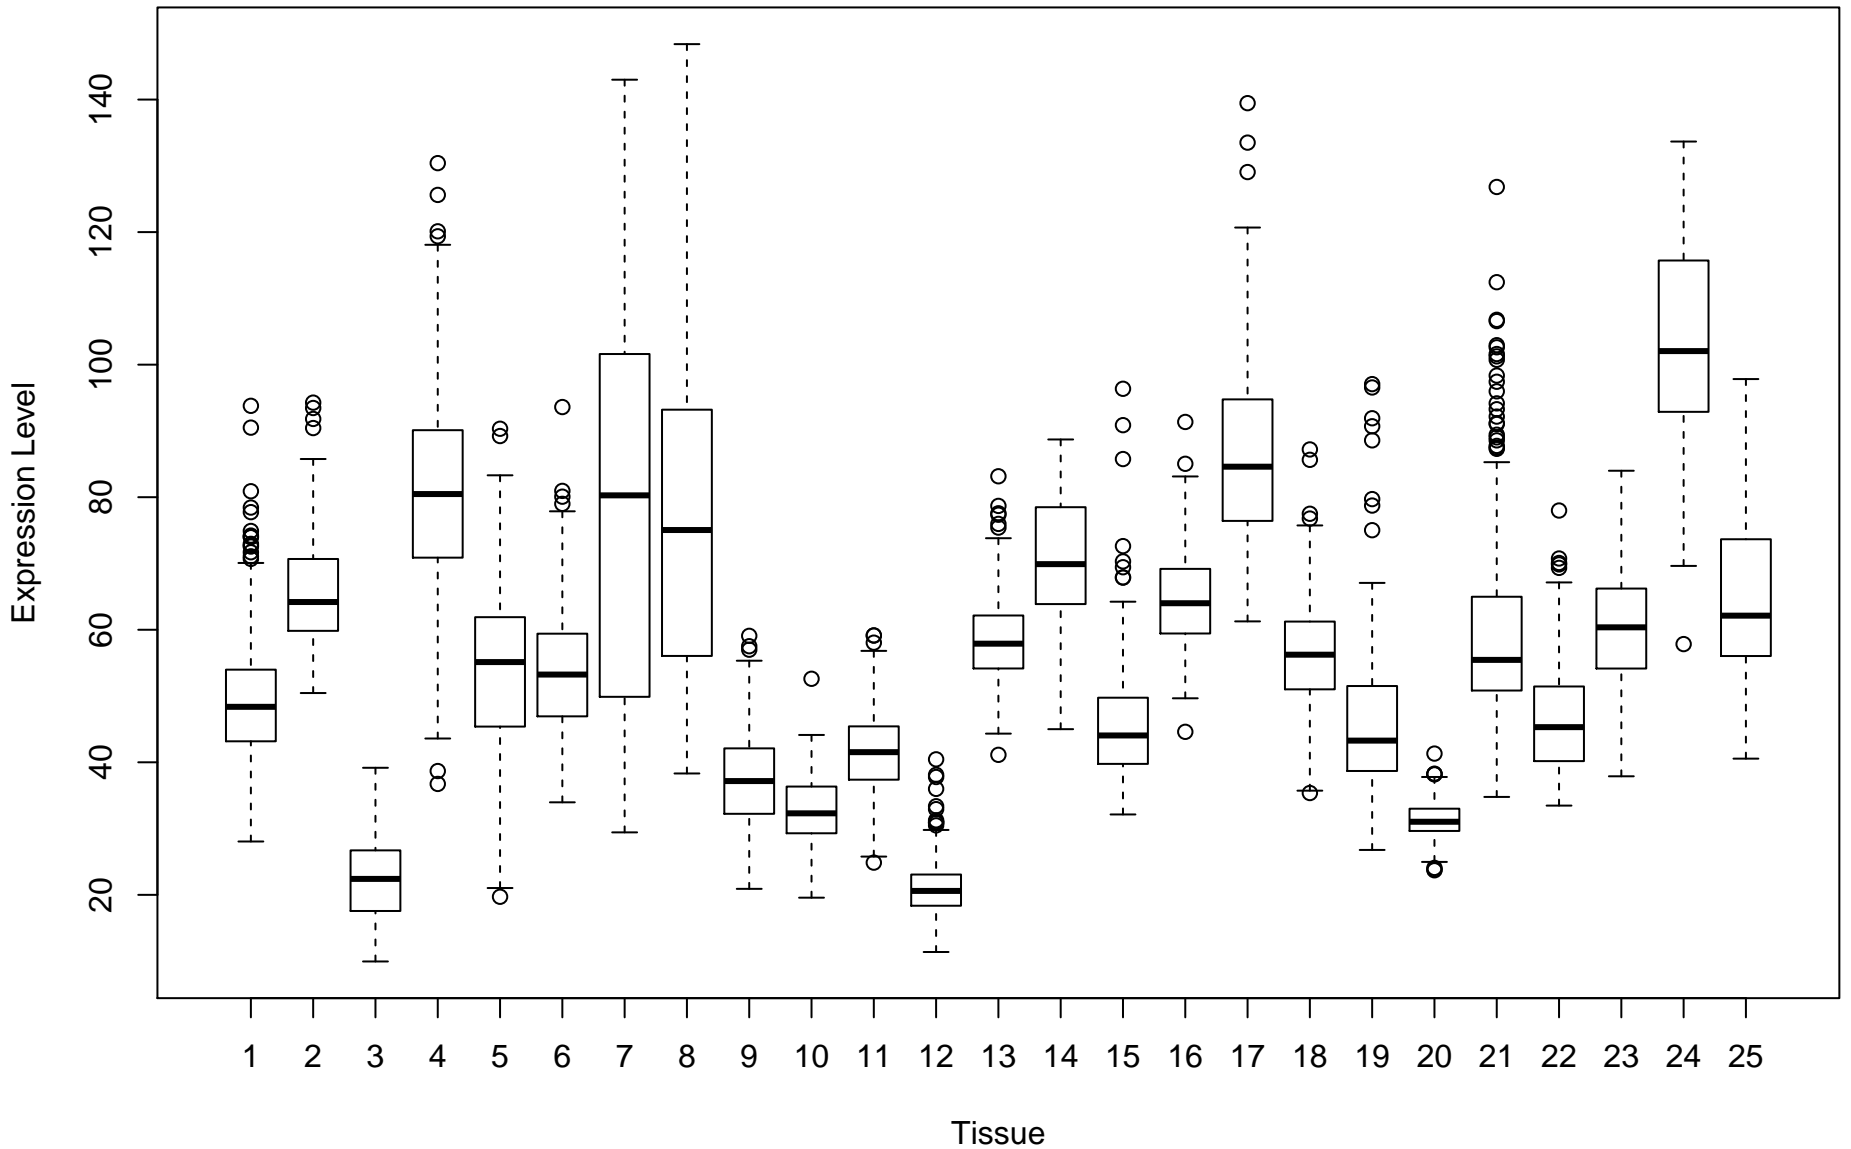

# PTPRA

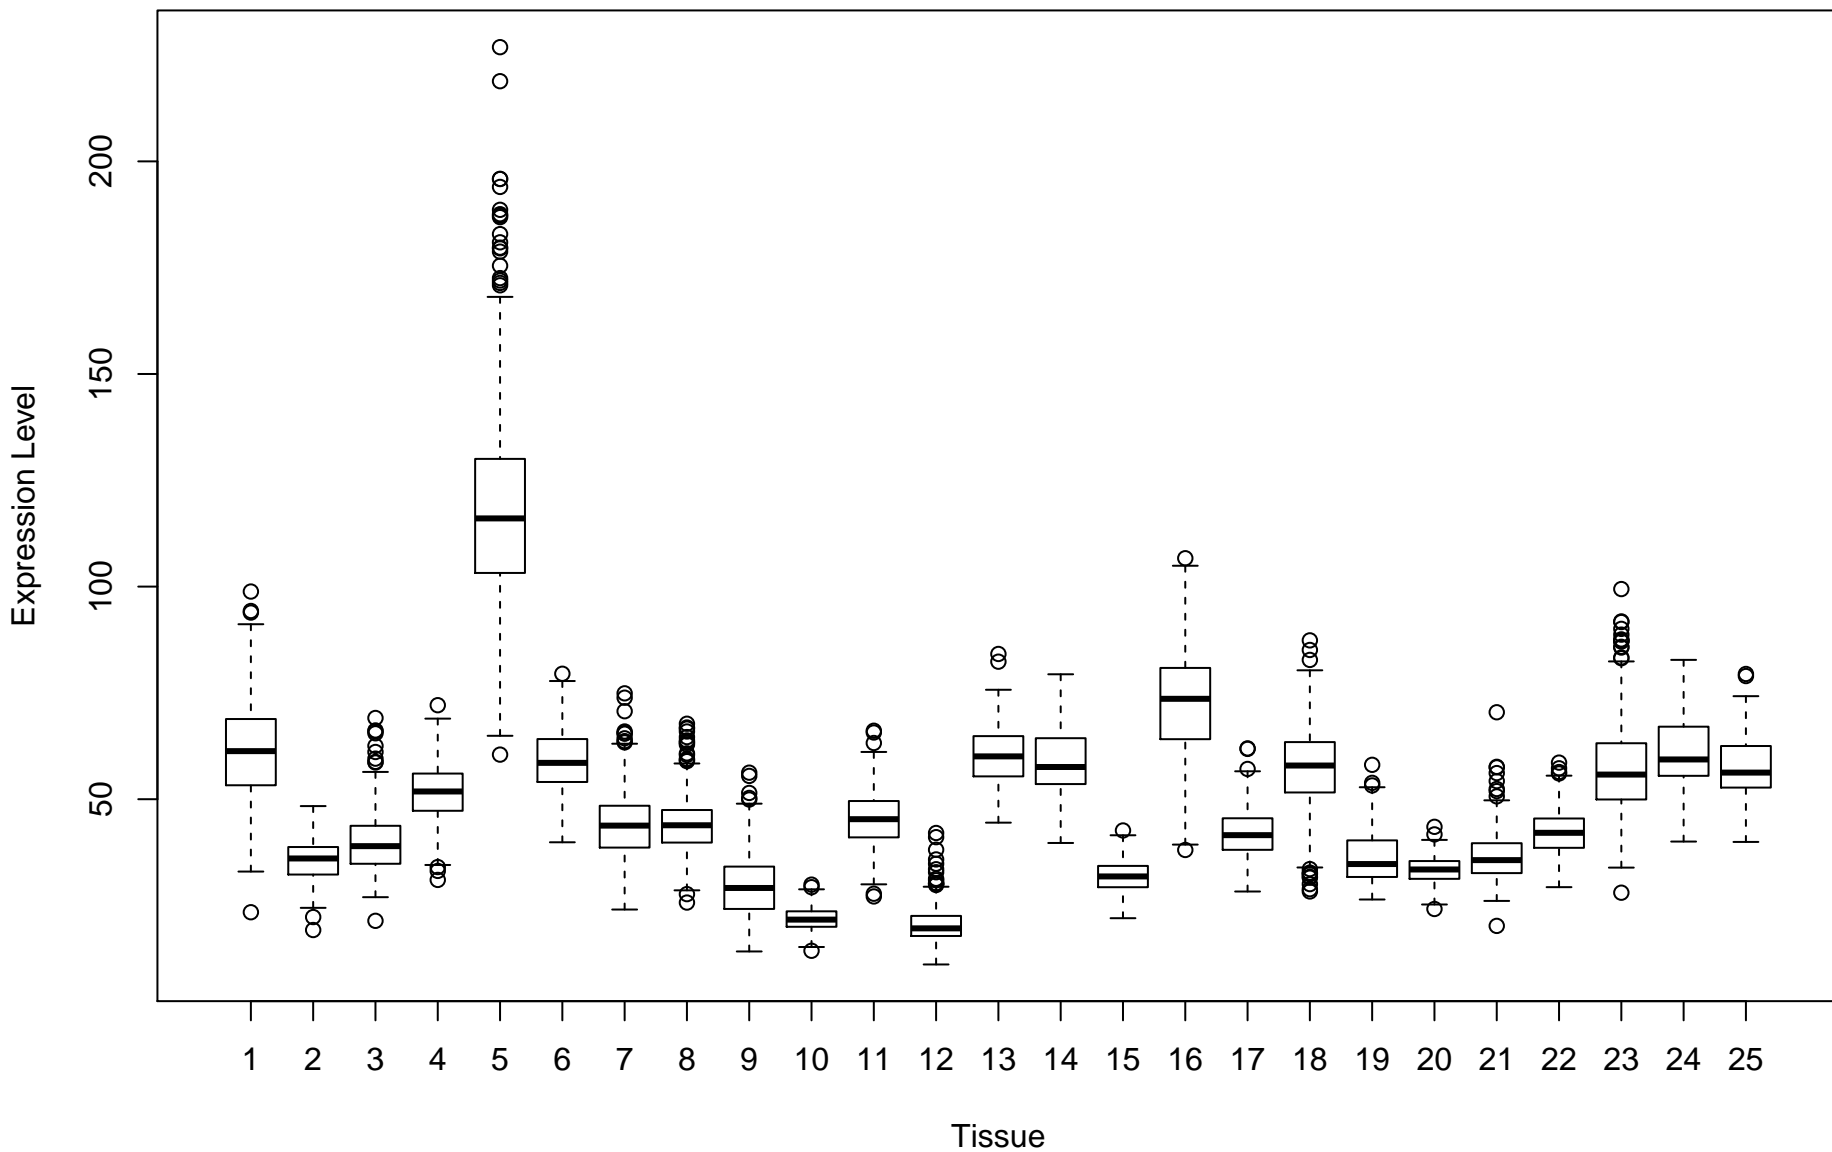

# YAP1

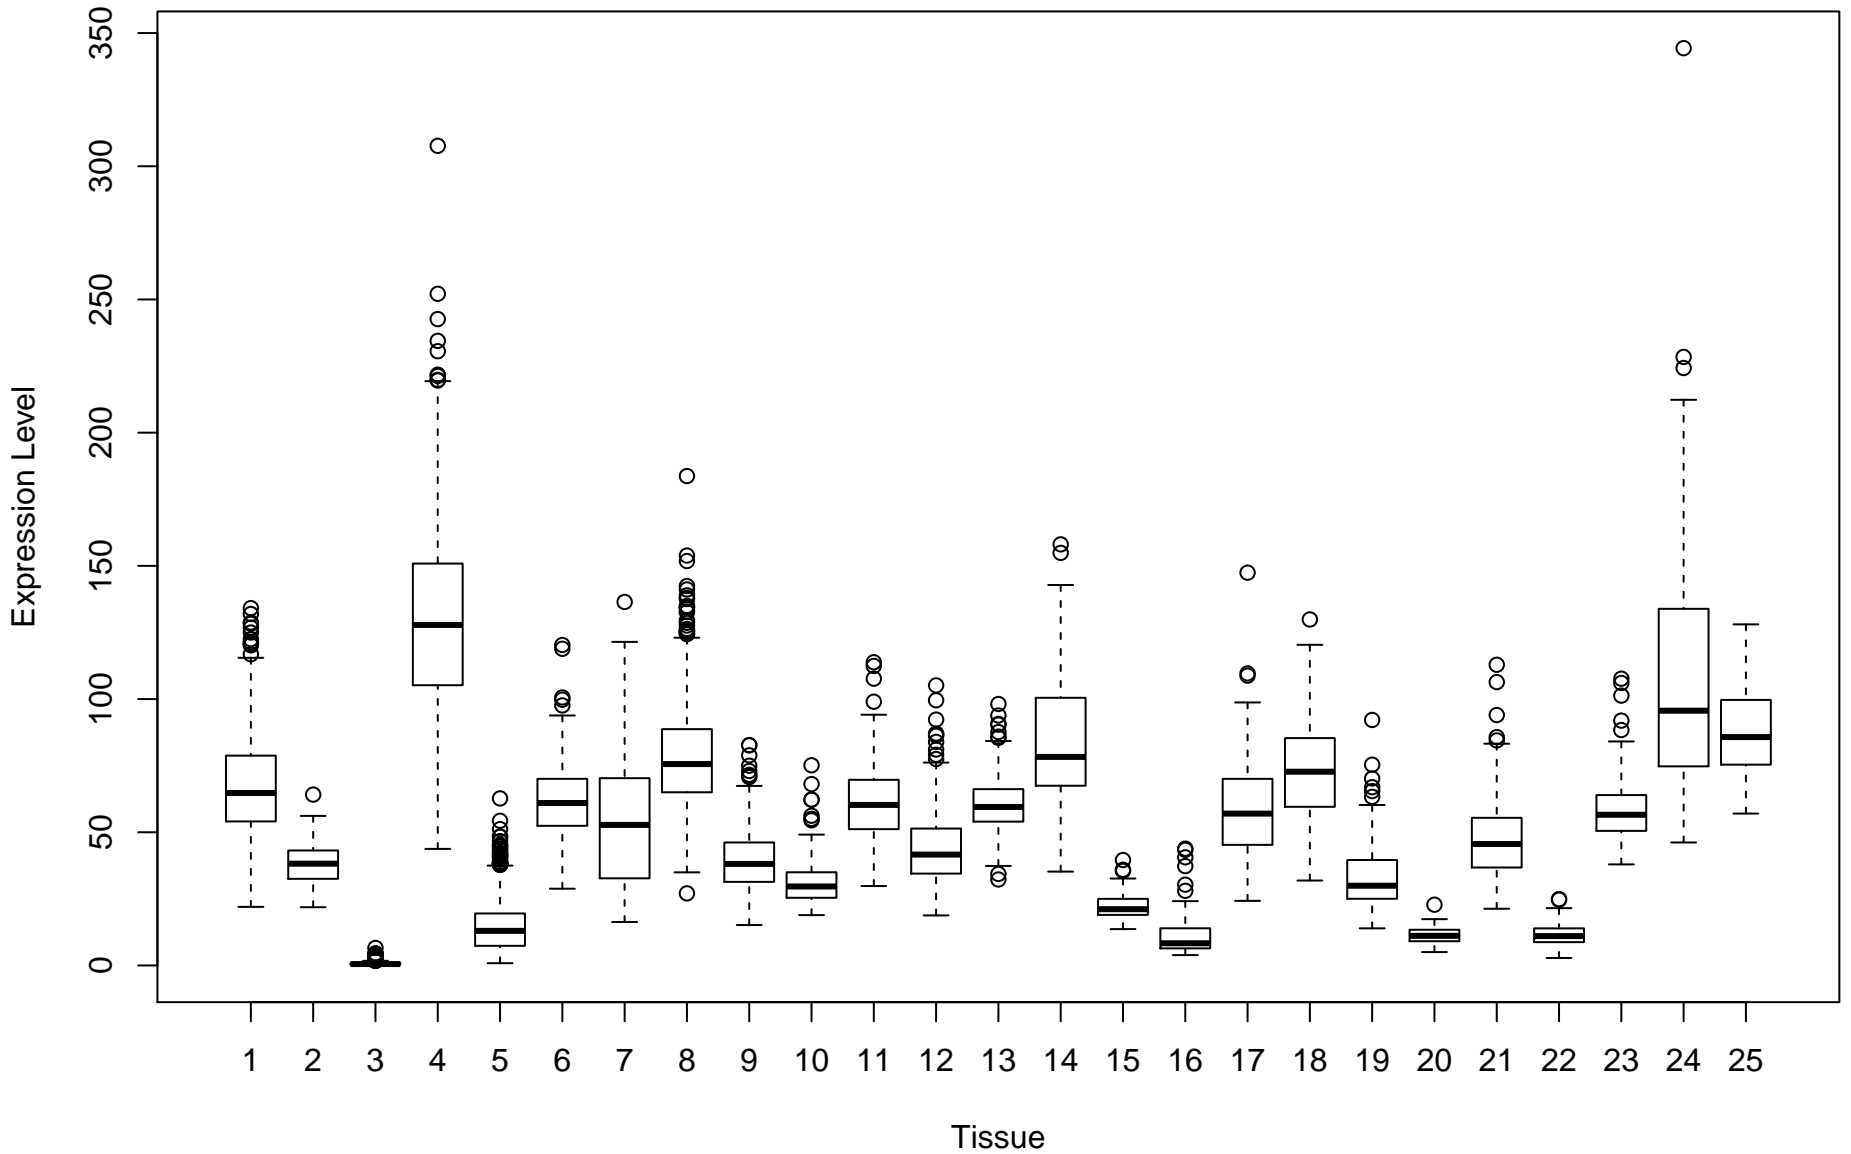

# CLIC1

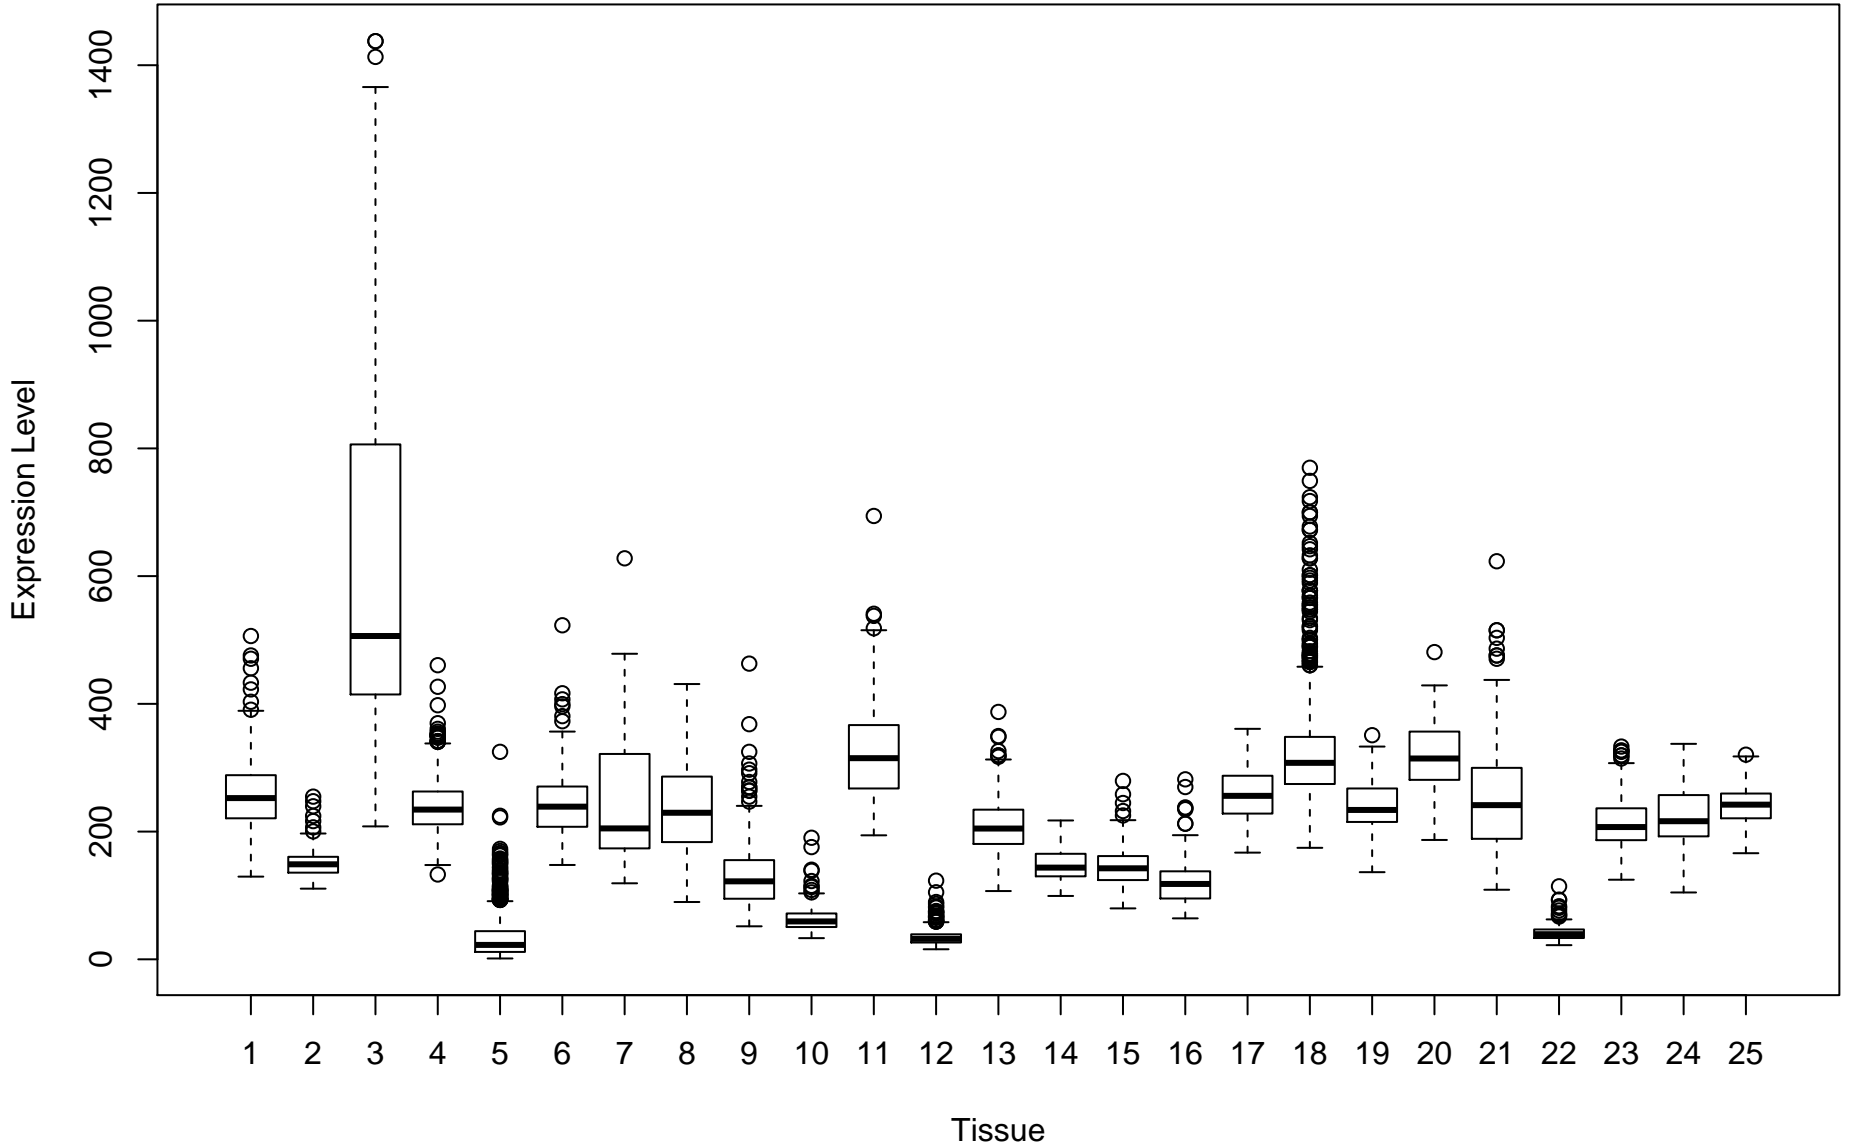

# TMEM109

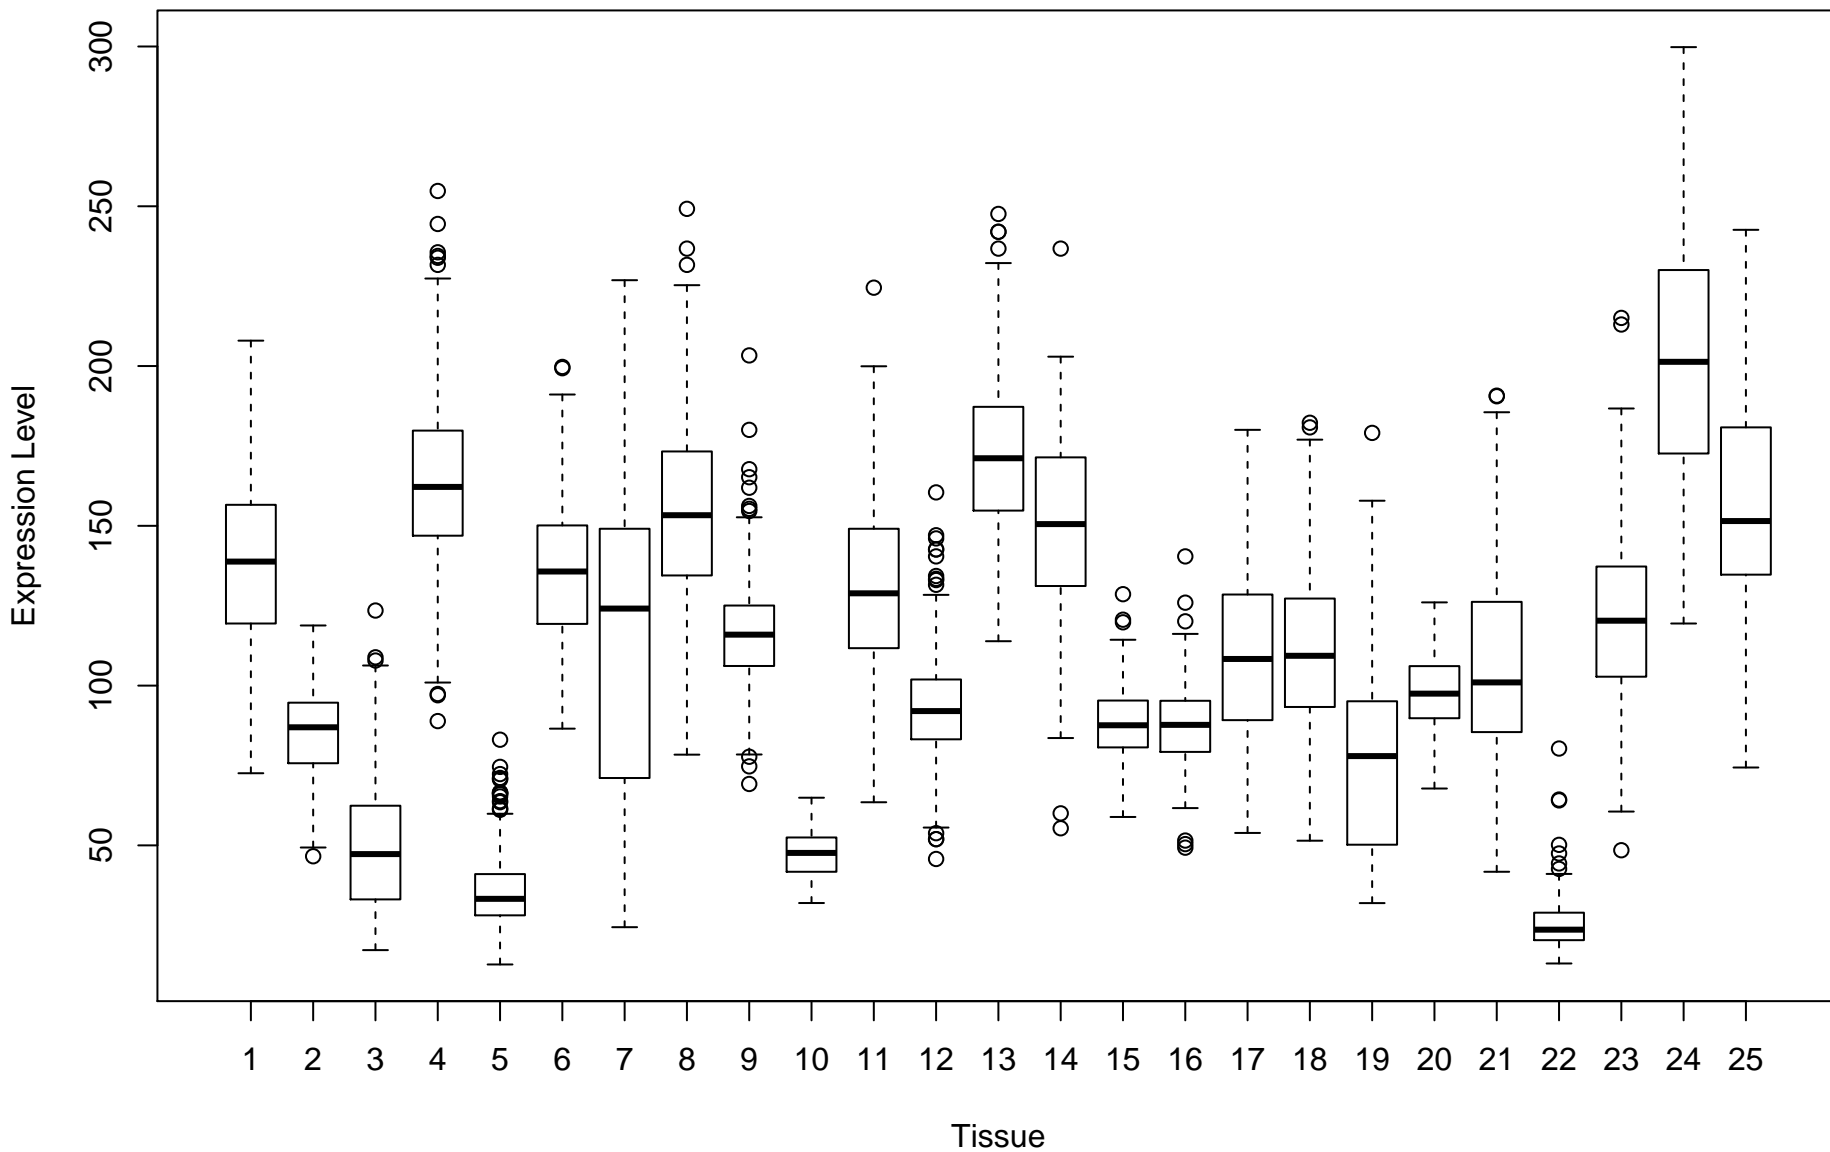



# MOCS2

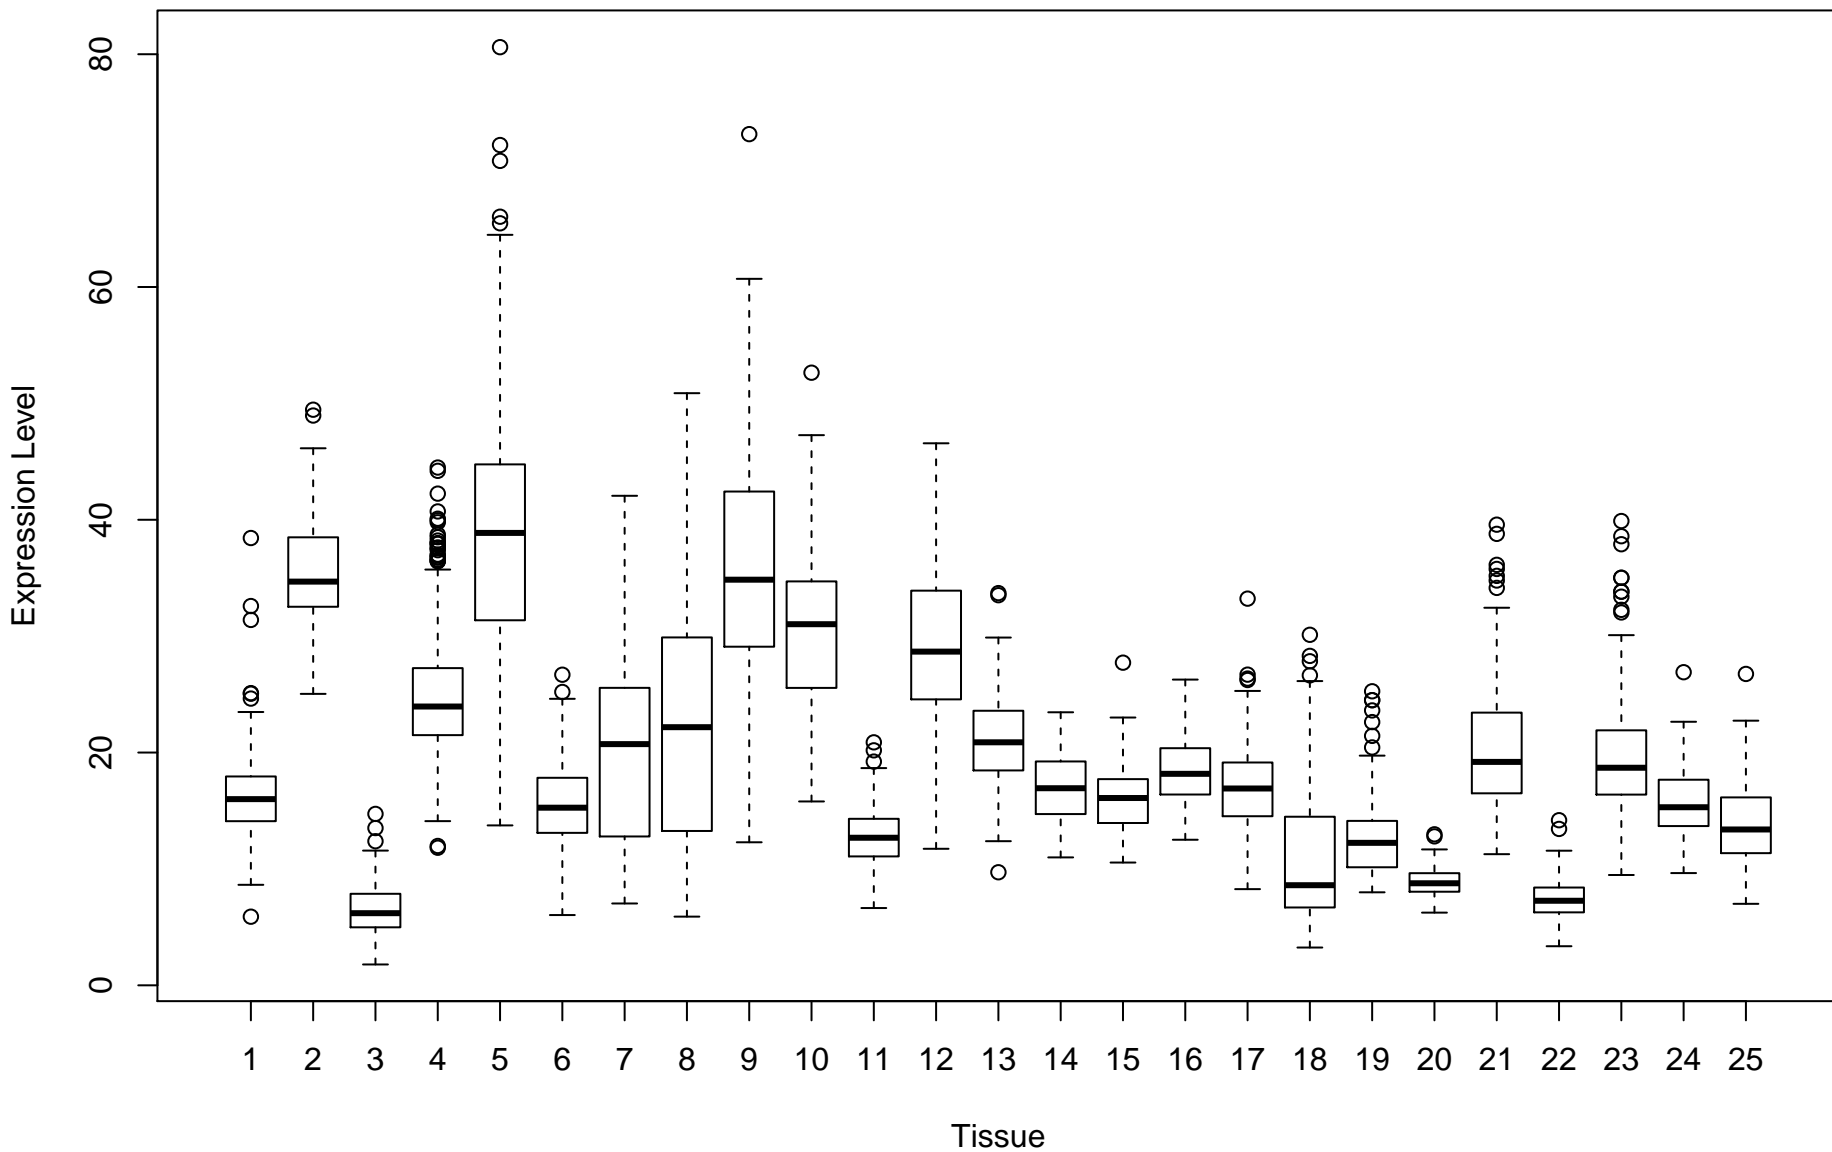

# PTPRF

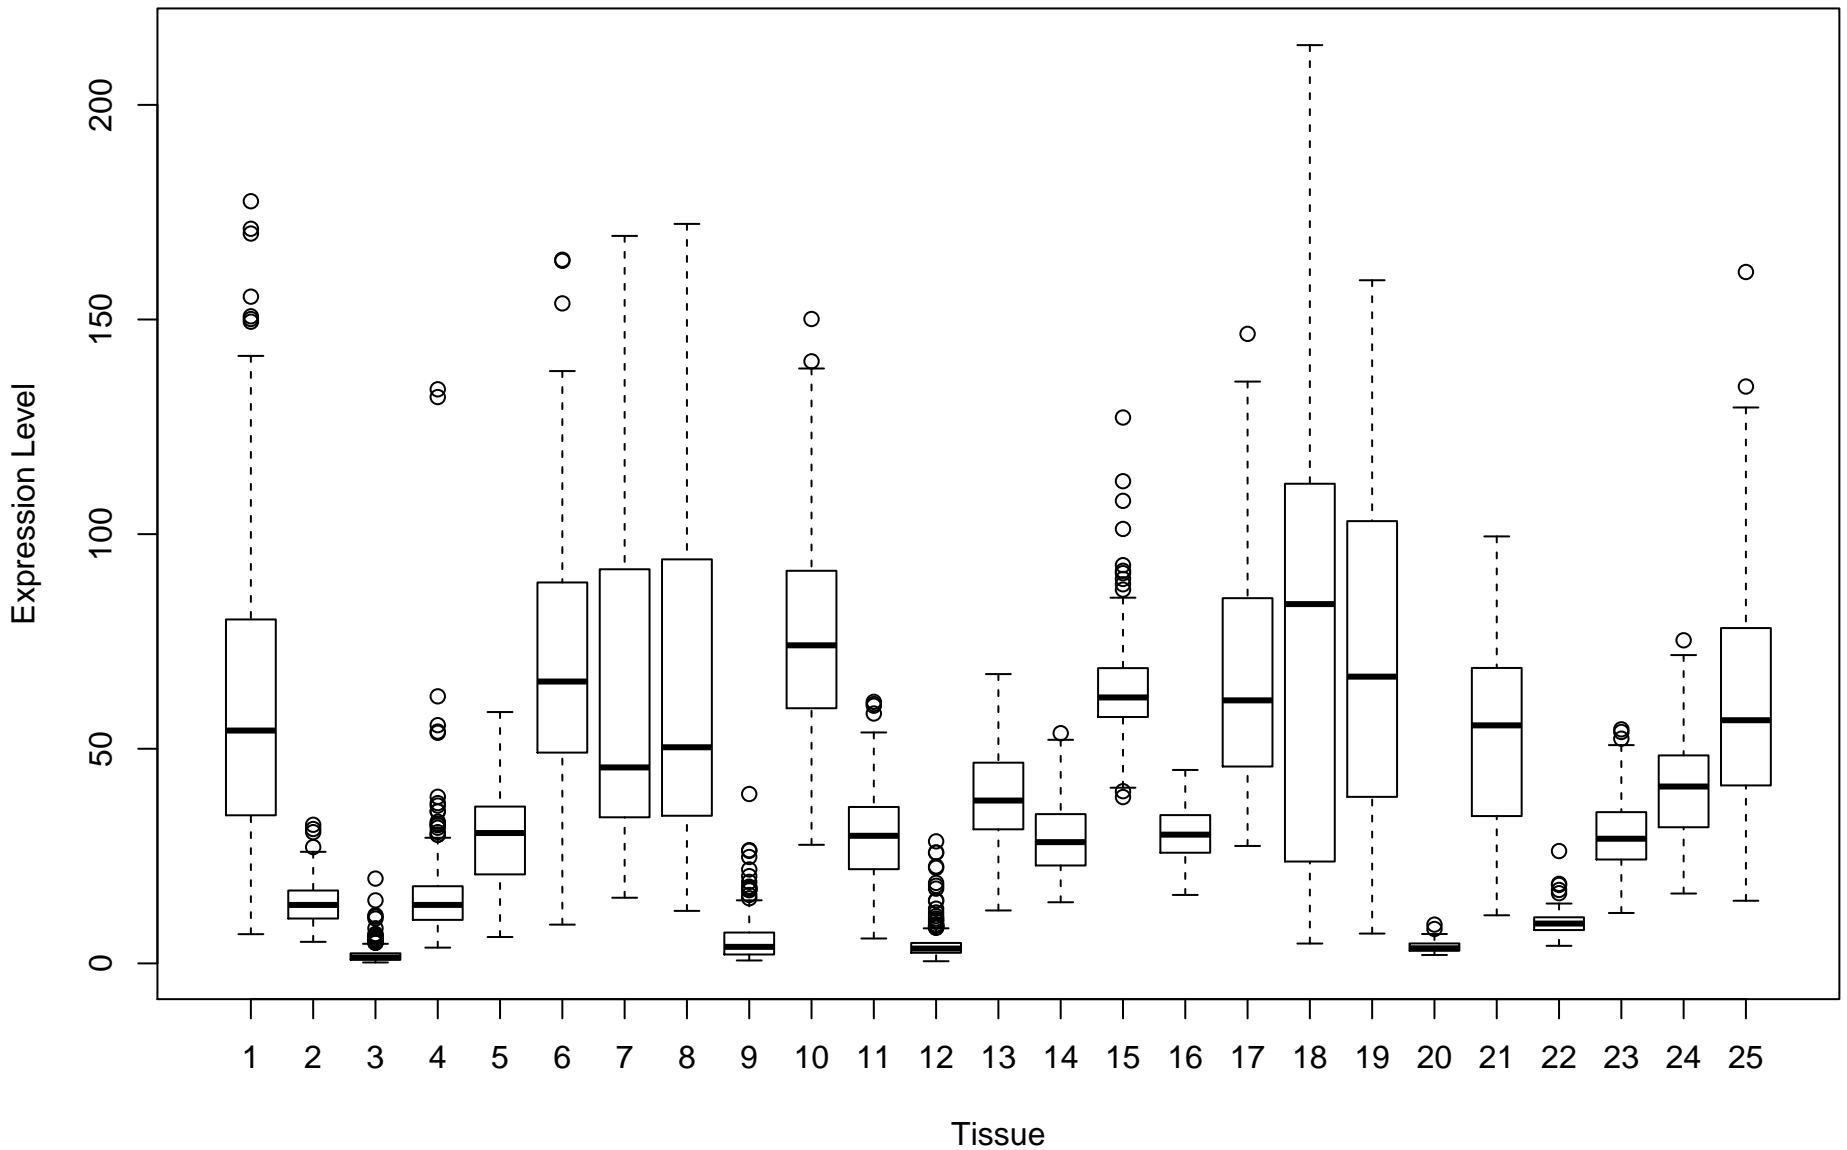

# MYO1C

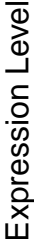

# Tissue

# FAM127B

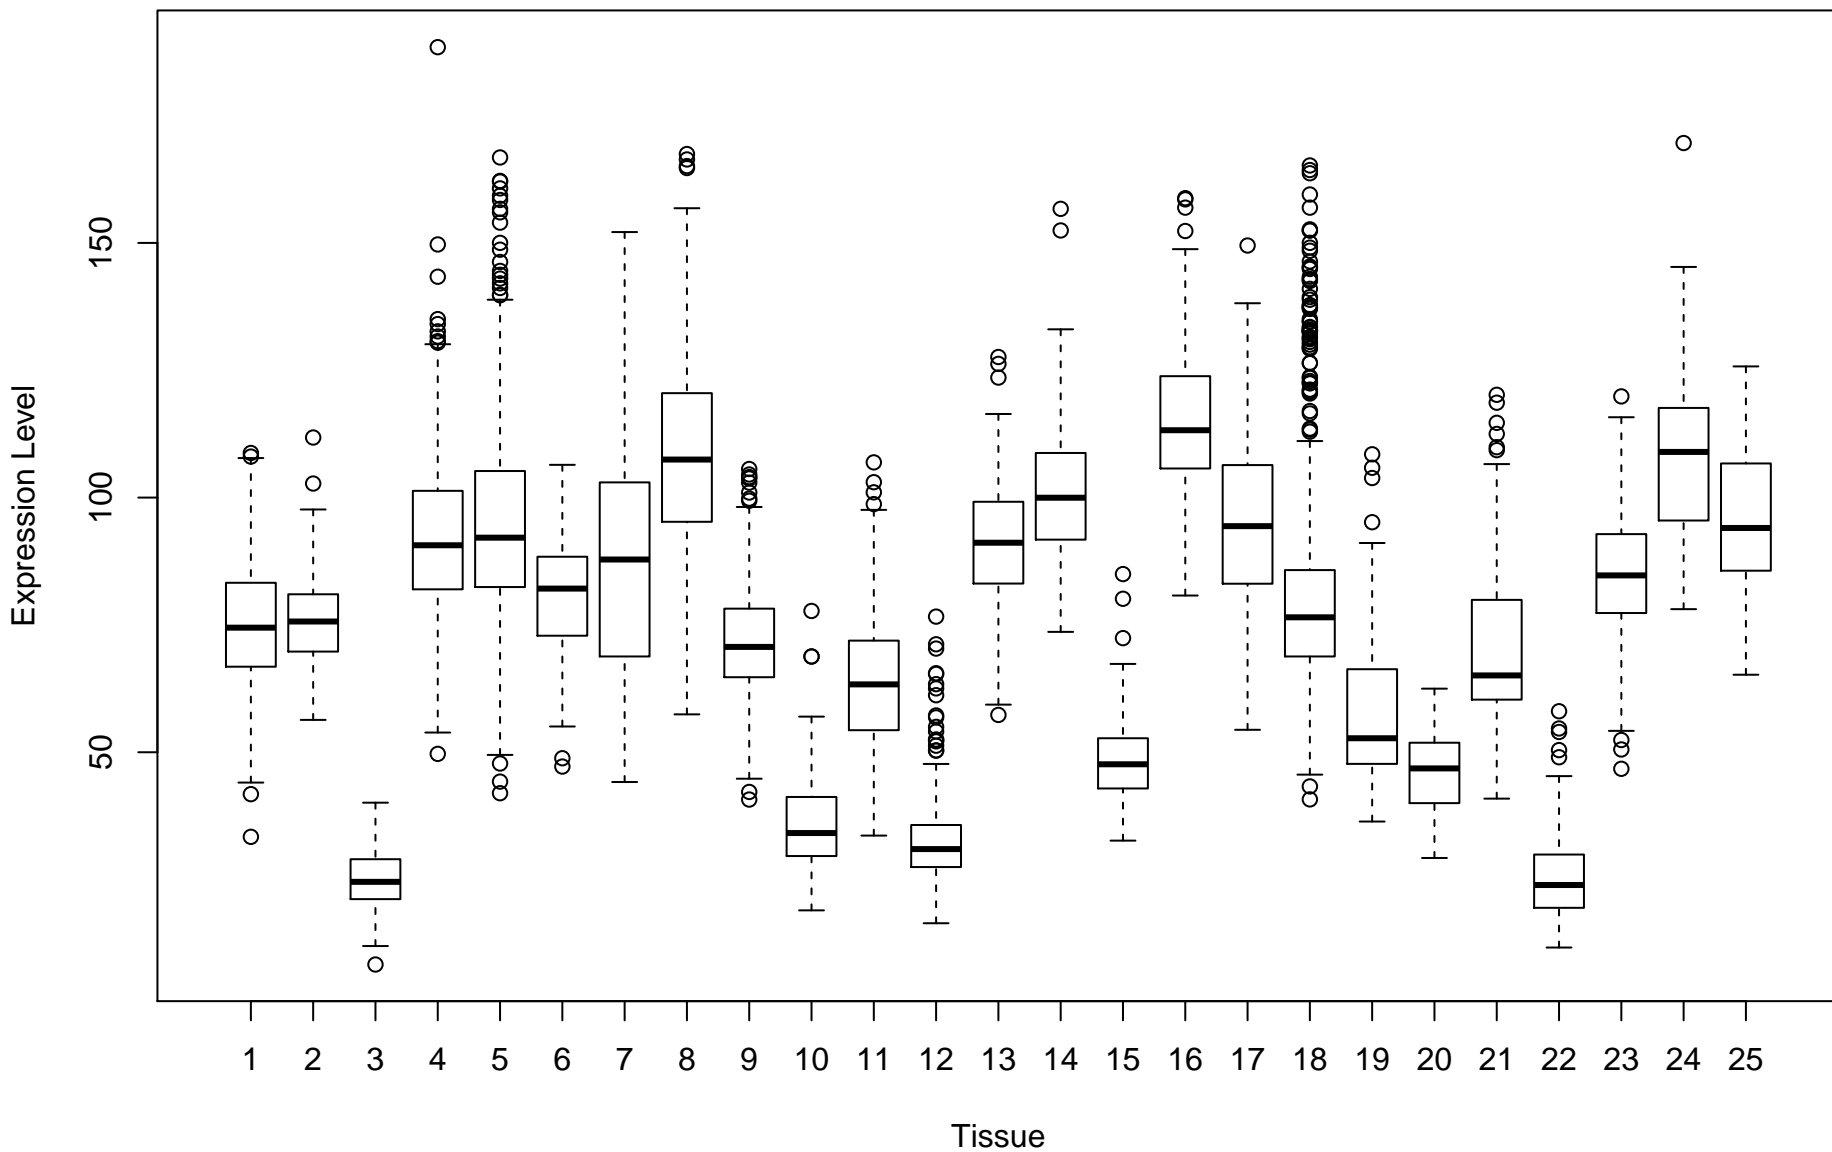

# TRIP10

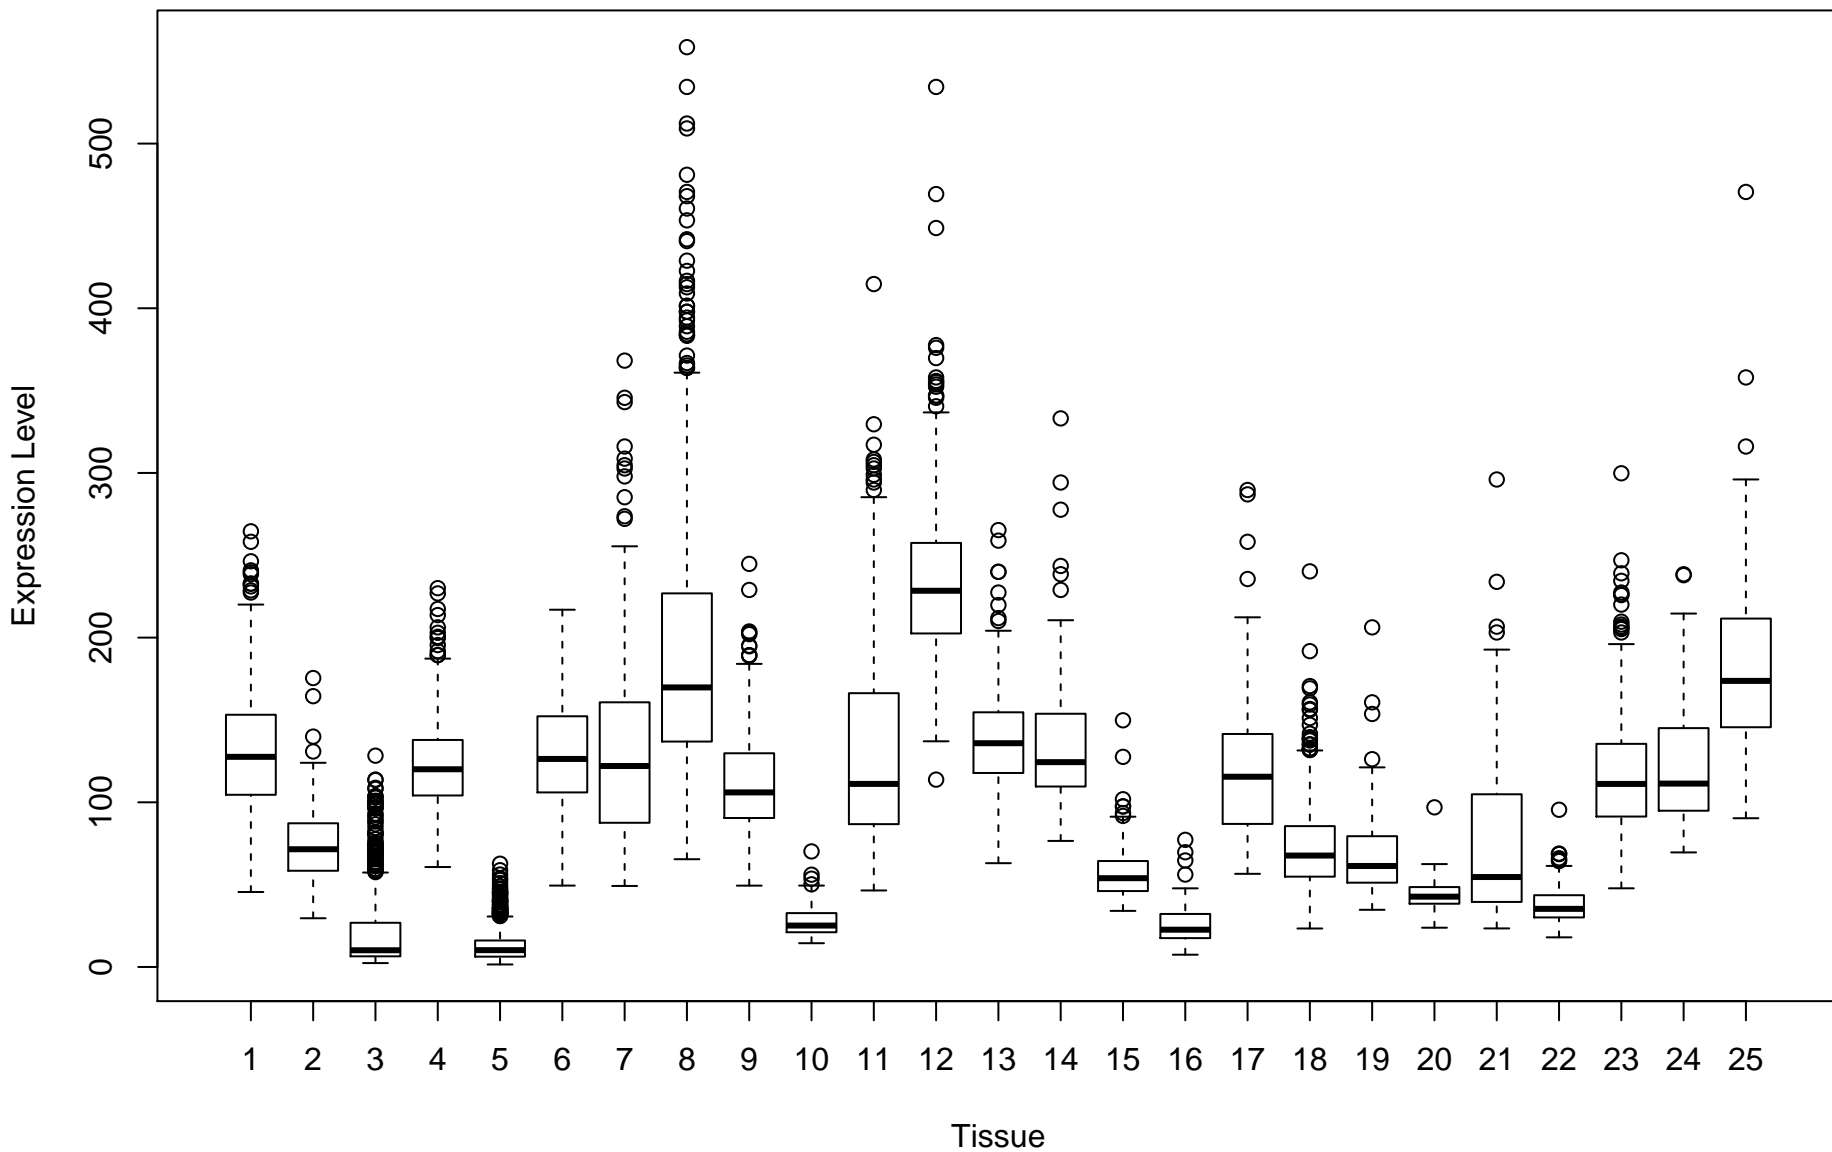

# SERPING1

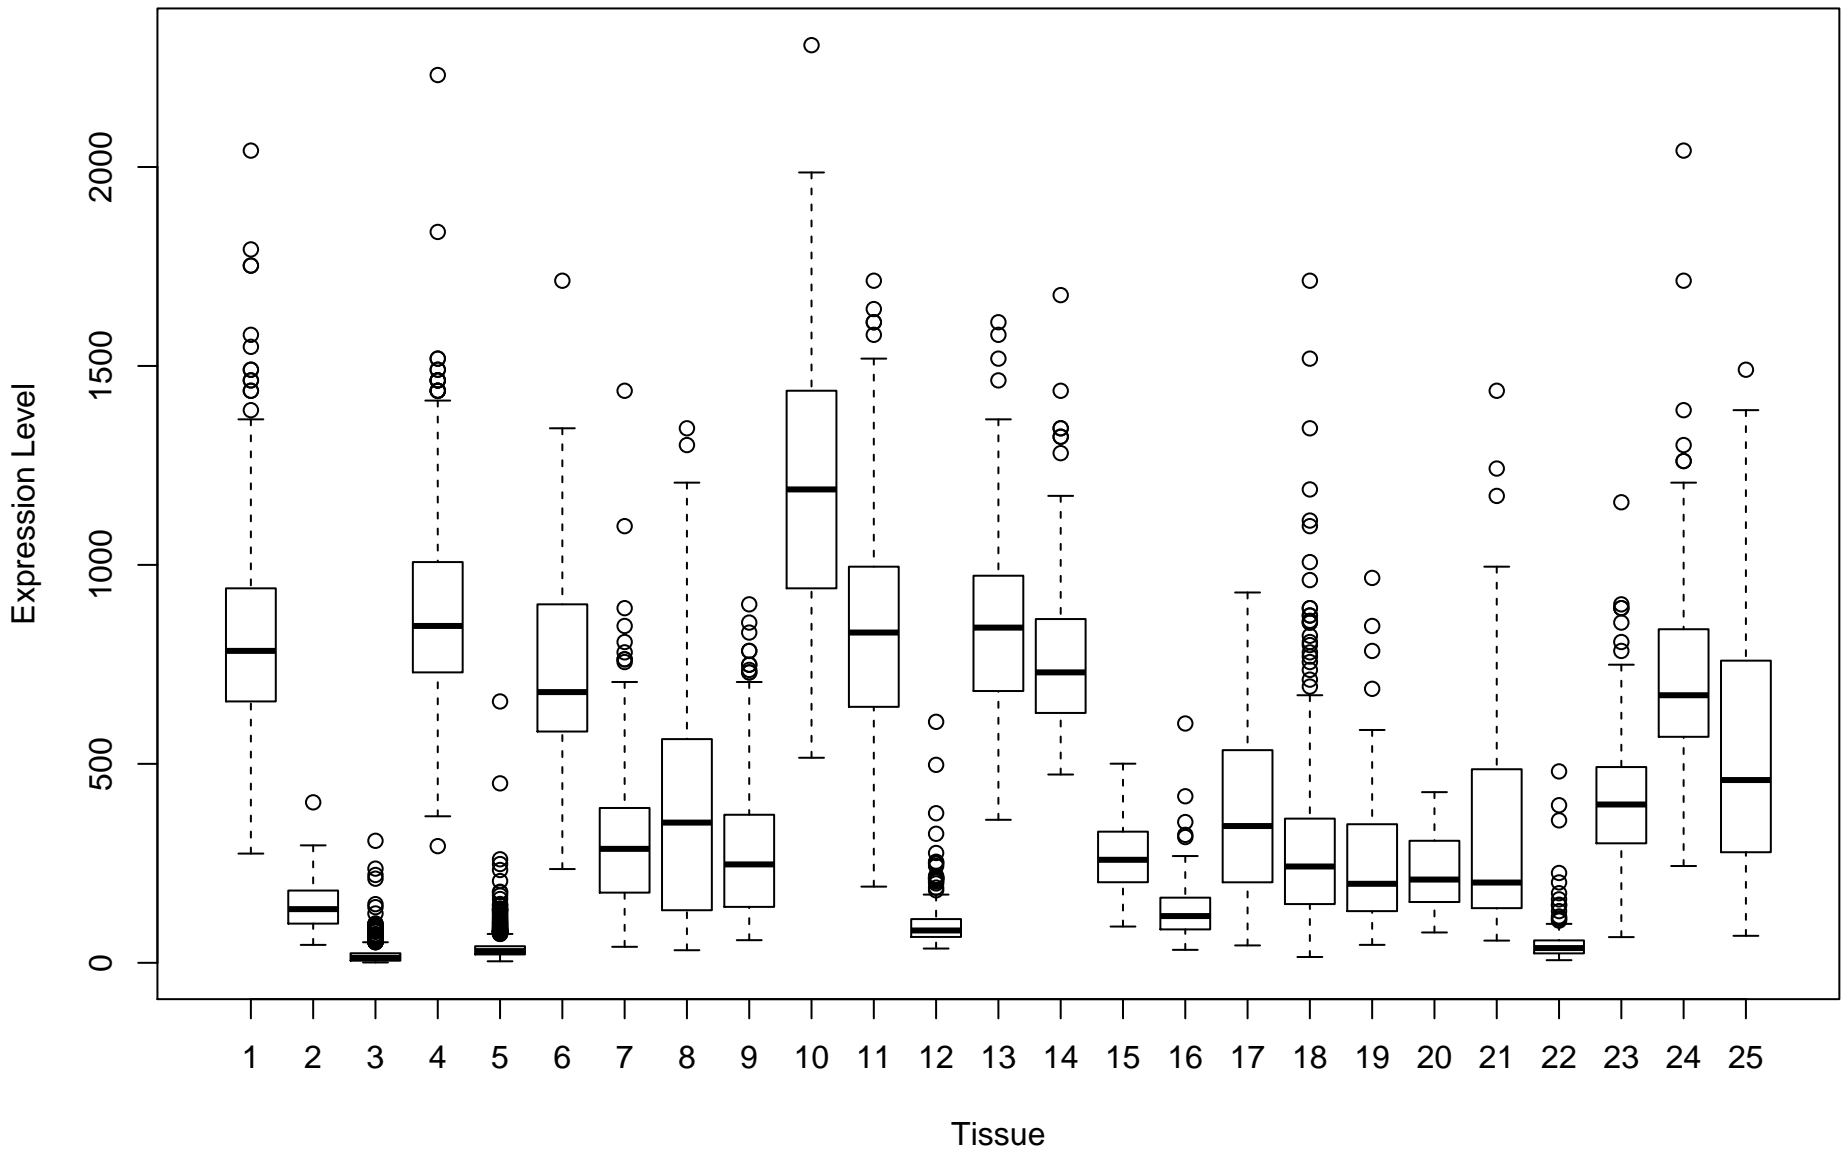

# TOM1L2

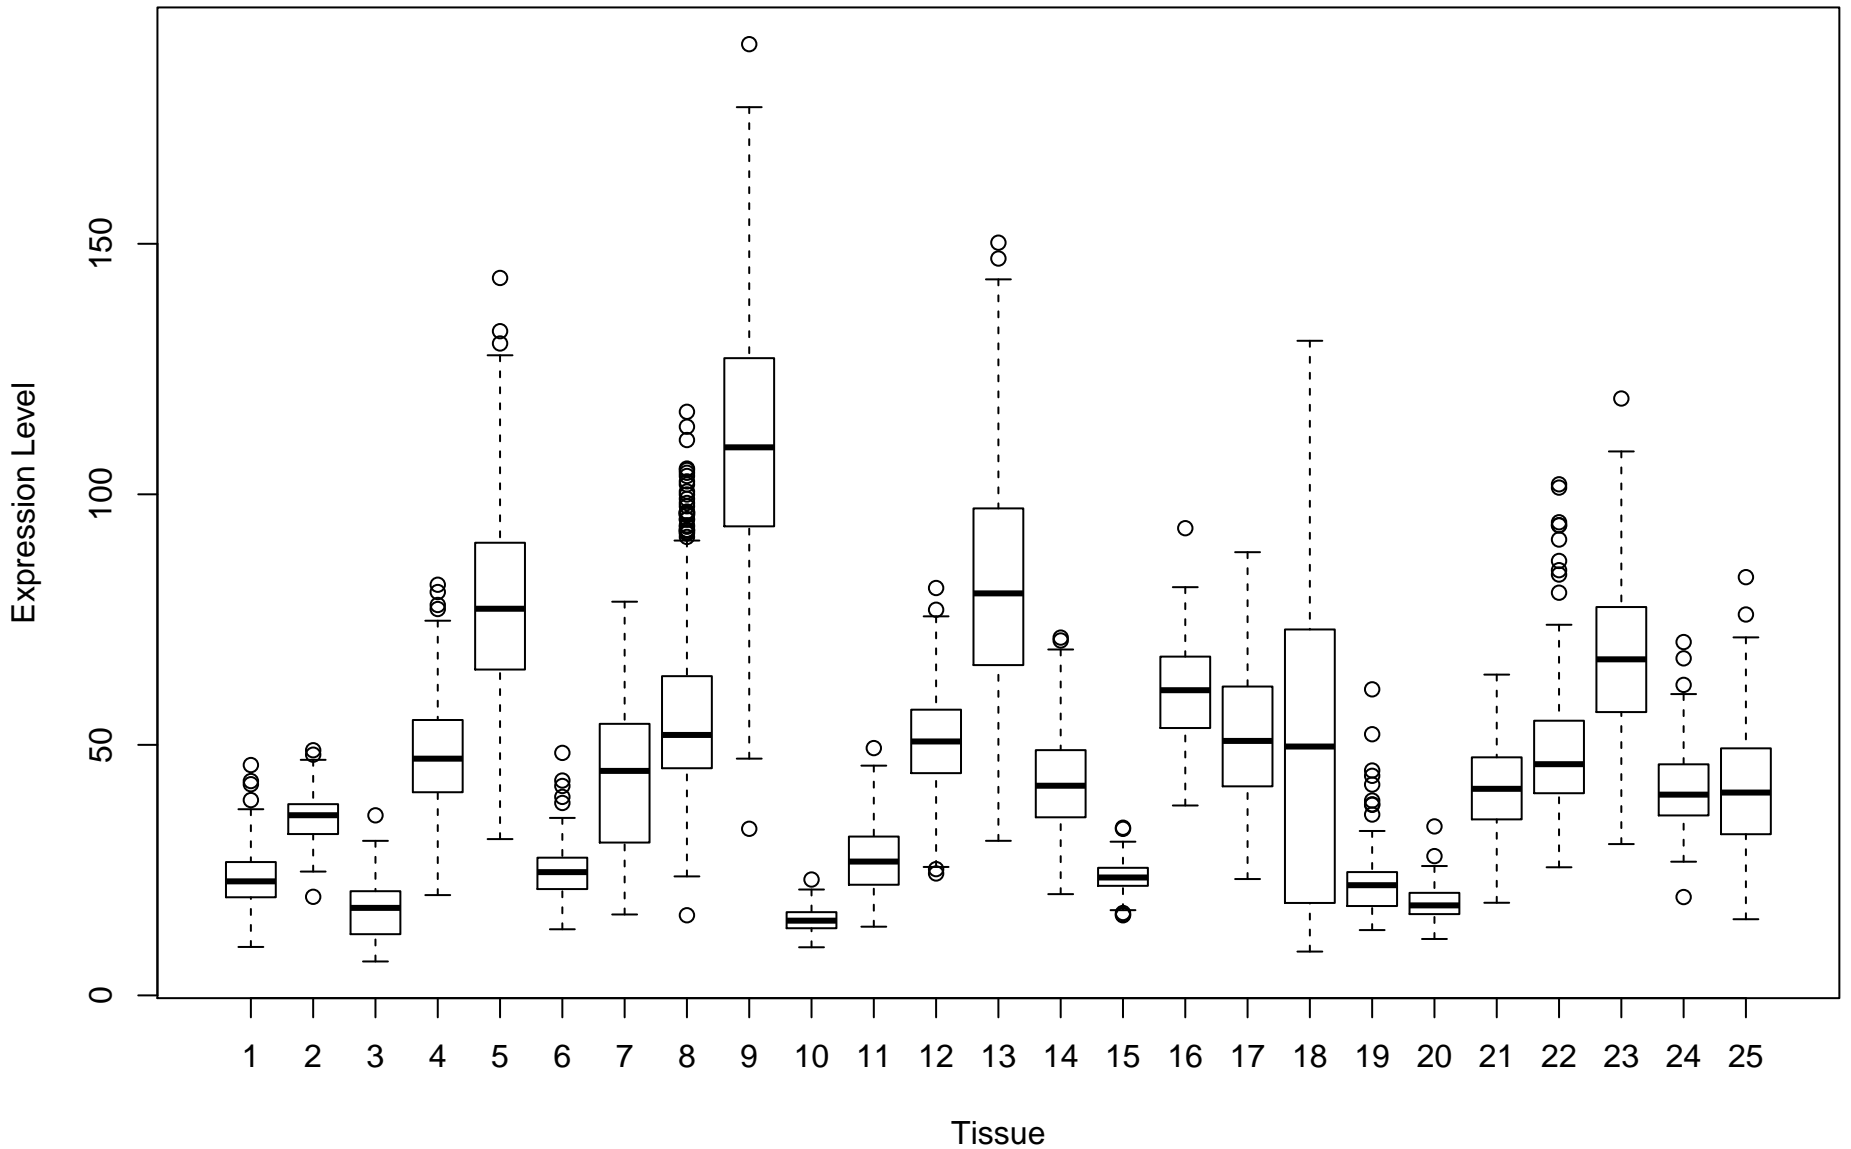

Supplement: s1 [file s1]
